# Supplementary material for: SA-SSR: a suffix array-based algorithm for exhaustive and efficient SSR discovery in large genetic sequences
Source: PubMed Central journal article supplement — Bioinformatics. 2016 May 11;32(17):2707–9. doi: 10.1093/bioinformatics/btw298 (PMC5013907; doi:10.1093/bioinformatics/btw298), 2016-05-11
Supplement: supp_btw298_Supplement.pdf [file supp_btw298_Supplement.pdf]

## Supplementary Text 1. Suffix and Longest Common Prefix Arrays

A suffix array is an array of character positions representing a list of all possible suffixes of a string, ordered lexicographically. Consider the sequence “CAGAGAS\$”. A proper suffix array implementation would not enumerate a list of suffixes, but viewing the list helps conceptualize suffix array construction (see Supplementary Fig. 1A and B). The suffix and longest common prefix arrays (with zero-based indexing) for this sequence are shown in Supplementary Fig. 1C. The 6 in position 0 of the suffix array (Supplementary Fig. 1B and C) informs us that the suffix beginning at position 6 (i.e., “\$”) is lexicographically first. The 5 in position 1 of the suffix array informs us that the suffix beginning at position 5 (i.e., “A\$”) is lexicographically second. Likewise, the 2 in position 6 of the suffix array informs us that the suffix beginning at position 2 (i.e., “GAGAS\$”) is lexicographically last.

Longest common prefix arrays are arrays of the lengths of the longest common prefix of each adjacent suffix in the suffix array. To illustrate, consider position 3 in the suffix and longest common prefix arrays in Supplementary Fig. 1C. The longest common prefix at this position is 3 (highlighted in red text in Supplementary Fig. 1C), meaning there are three common nucleotides at the beginning of the suffixes starting at positions 1 and 3 (i.e., “AGA”). The longest common prefix array stores the length of the longest common prefix, and the positions of the two suffixes in the original sequence are obtained by looking at the same position in the suffix array (in this example position 3), and the prior position in the suffix array (in this example position 2). This longest common prefix is represented in red nucleotides in Supplementary Fig. 1B. Although the sequence is the same, they are adjacent in the original sequence. These relationships are the basis for our algorithm to find SSRs in a sequence. The longest common prefix array is constructed while creating the suffix array.

## Supplementary Text 2. Calculating SSR Length and Position from Suffix and Longest Common Prefix Arrays

Let  $k$  equal the length of an SSR repeating unit or period size,  $r$  equal the number of times it repeats after the original occurrence, and  $p$  equal the position of the first nucleotide of the first period of the SSR. For example, consider the repeating unit “ACG” in the sequence “ACGACGACG”. The length of the repeating unit is 3 ( $k$ ), there are three instances of the unit ( $r + 1$ ), and the SSR begins at position 0 in the sequence ( $p$ ). So in this example,  $k = 3$ ,  $r = 2$  ( $r + 1$  is the total number of repeats in the SSR), and  $p = 0$ . SSRs are identified by calculating  $k$ ,  $p$ , and  $r$  from the suffix and longest common prefix arrays. Let  $i$  equal the index of any entry in the suffix array (except the first position), where SA and LCPA are the suffix and longest common prefix arrays, respectively:

$$k = |SA_i - SA_{i-1}| \quad (1)$$

$$r = \left\lfloor \frac{LCPA_i}{k_i} \right\rfloor \quad (2)$$

$$p = \text{MIN}(SA_{i-1}, SA_i) \quad (3)$$

If  $r > 0$ , an SSR of length  $k * (r + 1)$  exists at position  $p$  in the original sequence, otherwise if  $r = 0$  there is no SSR at position  $p$ . The base unit (e.g. AG in the SSR AGAGAG) of the SSR starts at position  $p$  and ends at position  $p + (k - 1)$ . Thus, by comparing each adjacent element in the suffix array we can find SSRs in a sequence.

Extending the previous example, Fig. 1C shows the values of  $k$ ,  $r$ , and  $p$  calculated from the suffix and longest common prefix arrays for “CAGAGAS\$”. Two SSRs, each of length 4, exist at positions 1 and 2 in the original sequence (i.e., “AGAG” and “GAGA”) and their locations are shown in Fig. 1D.

**Supplementary Figure 1. Suffix and Longest Common Prefix Arrays Example**

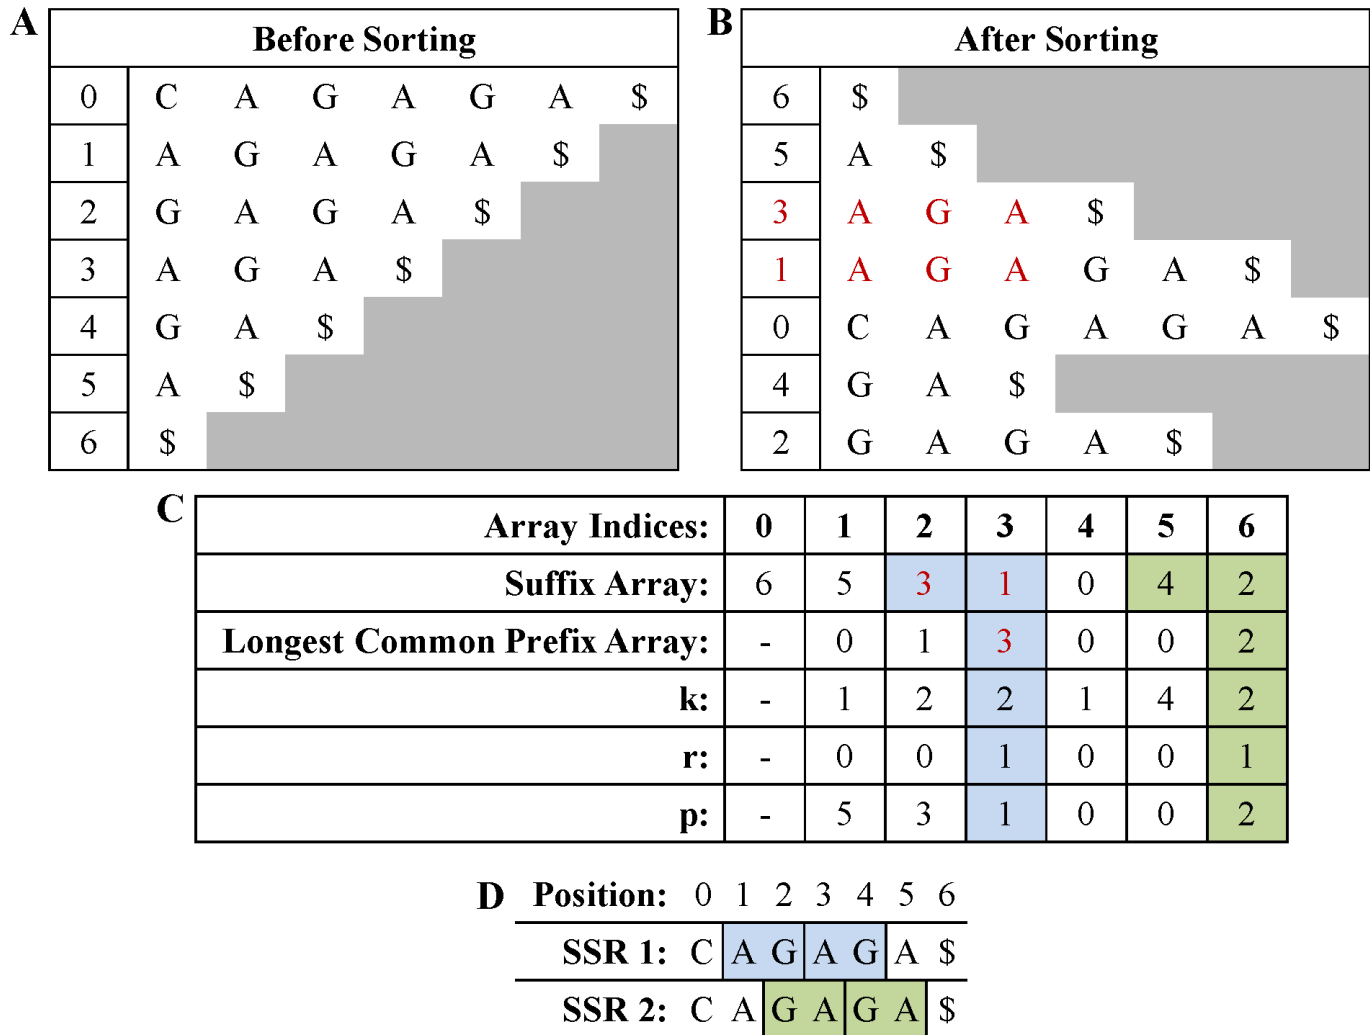

In this figure we demonstrate how to construct a suffix array and its use to identify SSRs. (A) First, all suffixes of “CAGAGAS”, are shown here and marked by their beginning position in the original sequence. (B) Next, the set of possible suffixes (part A) are ordered lexicographically, where ‘\$’ is the first character in the alphabet, and maintain their start positions in the original sequence. The start positions are the numbers to the left of each suffix. The new ordering of these start positions is the suffix array. (C) Here we show the suffix array, longest common prefix array, and three parameters: k, r, and p (explained in the text). The suffix array stores the ordered start positions determined by ordering possible suffixes (shown in part B). (D) This particular sequence has two SSRs: “AGAG” and “GAGA”. In part D we show each of the two SSRs in the original sequence. SSR1 is highlighted blue, and SSR2 is highlighted green. The repeating units of the two SSRs are AG and GA, respectively, and a vertical bar separates each repeating unit in the sequence.

**Supplementary Figure 2.** *Arabidopsis thaliana* Sequence Length Density Plot

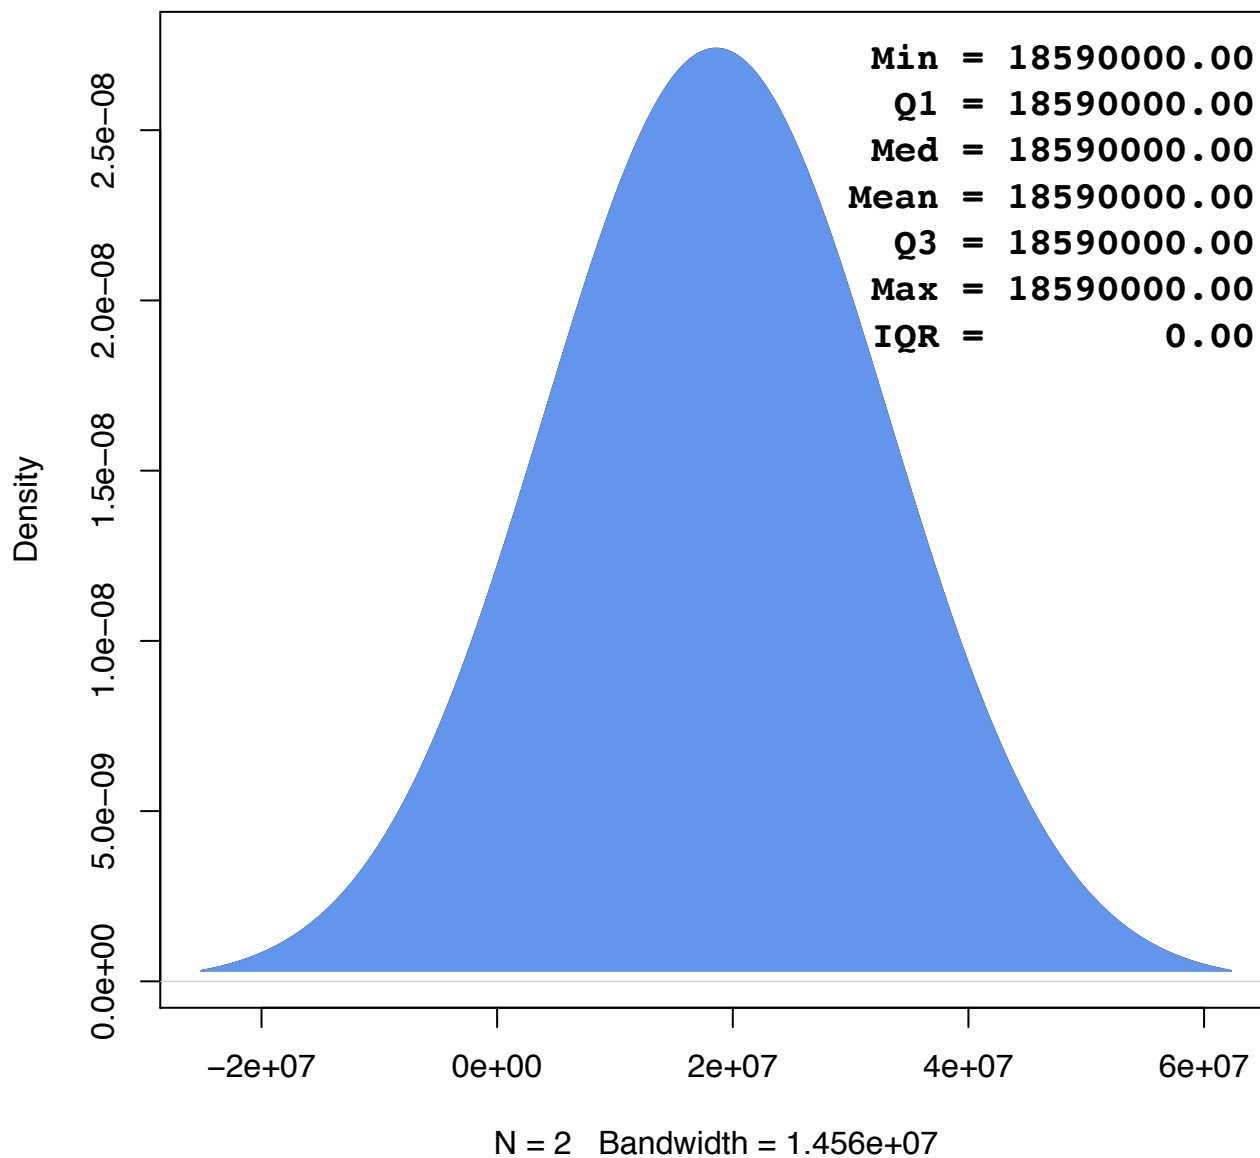

Density plot showing the distribution of sequence lengths for the *Arabidopsis thaliana* chromosome 4. A summary is included in the upper, right-hand corner.

**Supplementary Figure 3.** *Caenorhabditis elegans* Sequence Lengths Density Plot

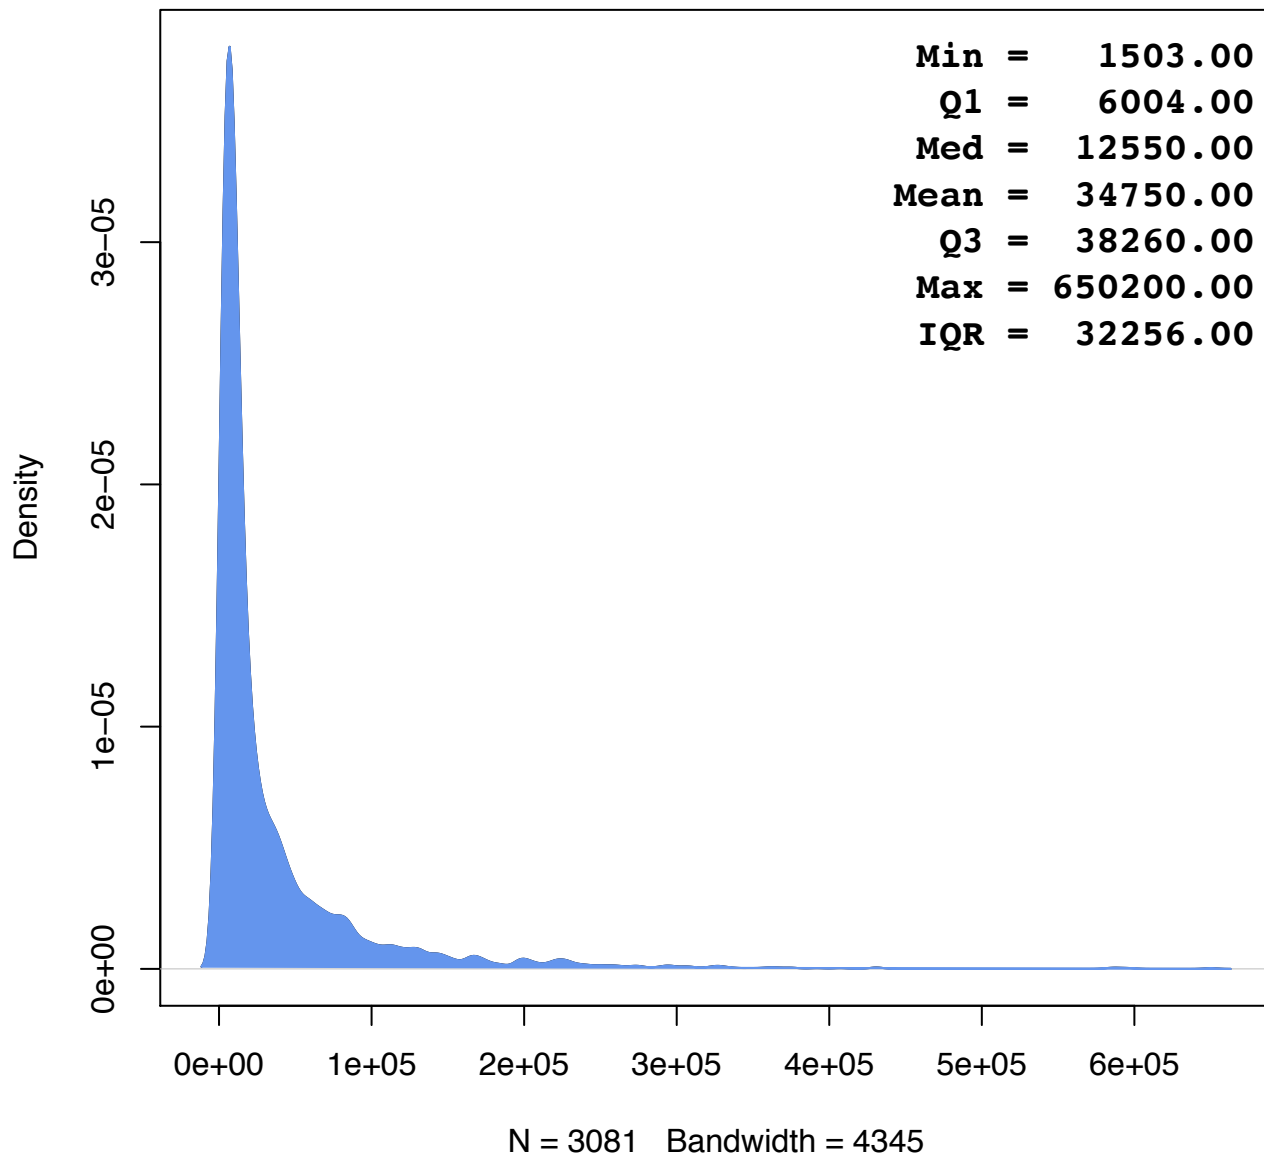

Density plot showing the distribution of sequence lengths for the *Caenorhabditis elegans* genome. A summary is included in the upper, right-hand corner.

Supplementary Figure 4. *Drosophila melanogaster* Sequence Lengths Density Plot

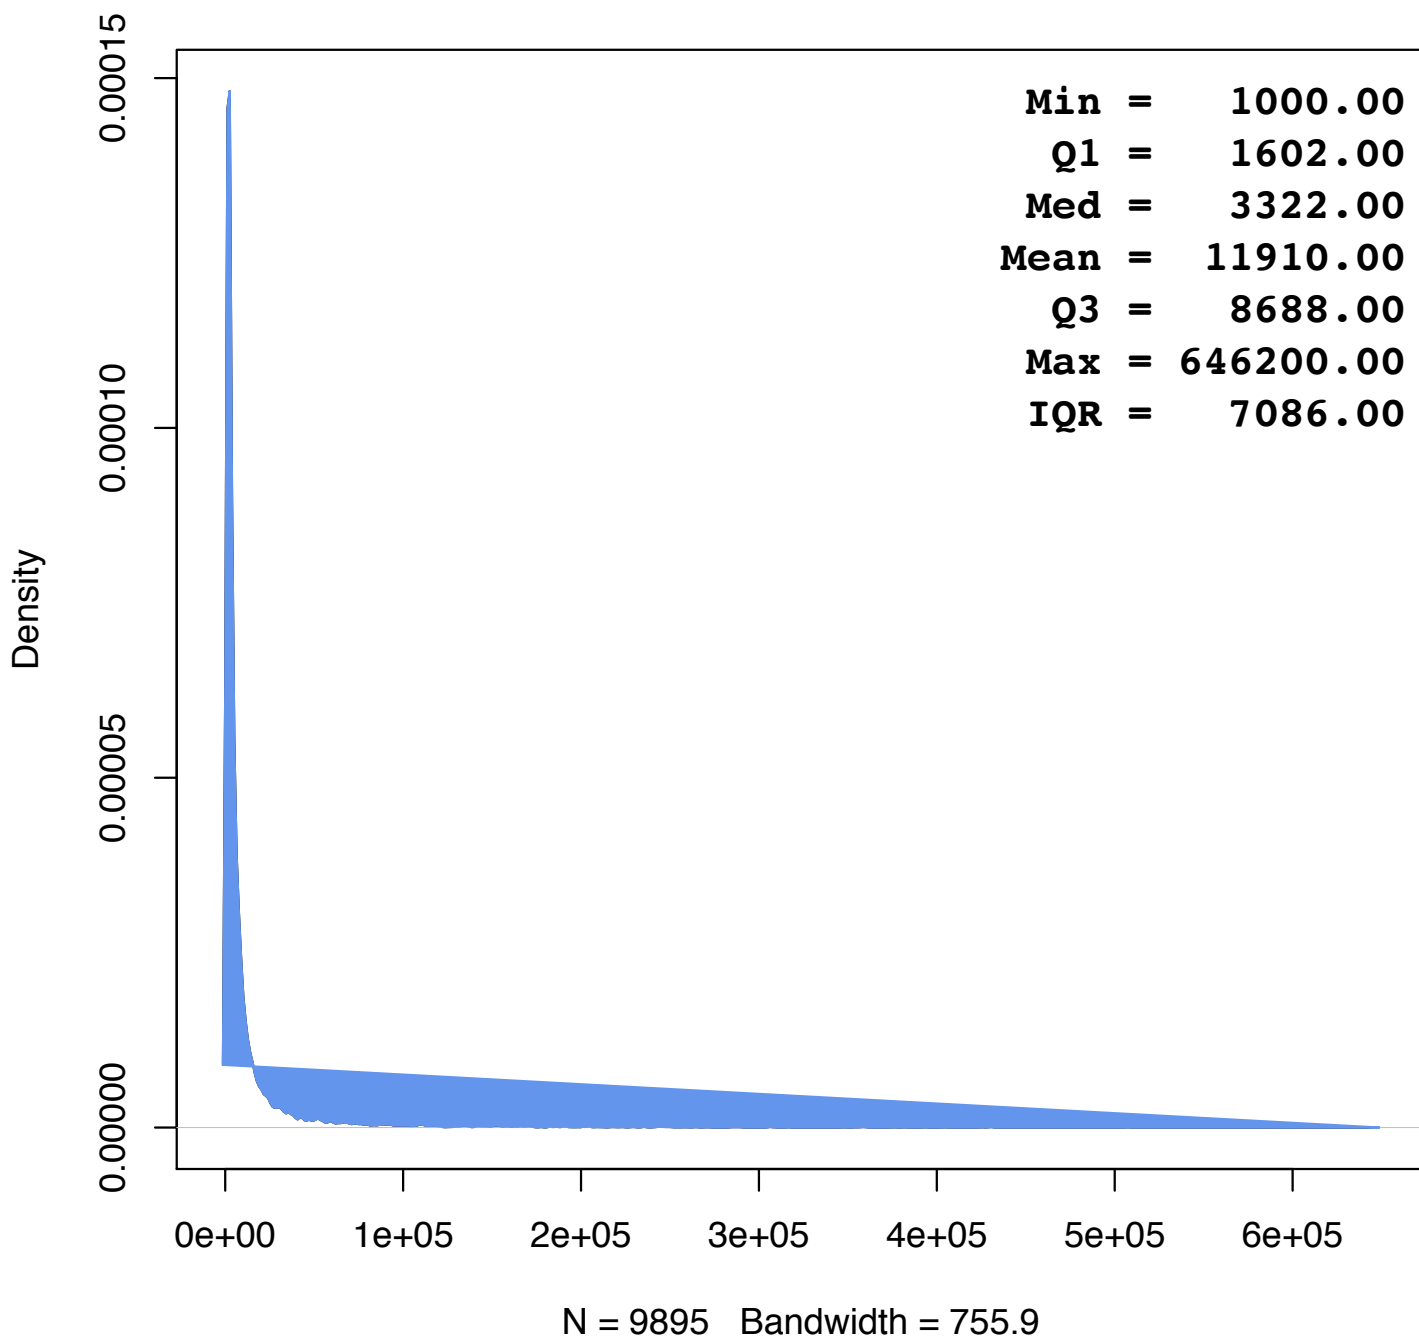

Density plot showing the distribution of sequence lengths for the *Drosophila melanogaster* genome. A summary is included in the upper, right-hand corner.

**Supplementary Figure 5.** *Escherichia coli* Sequence Lengths Density Plot

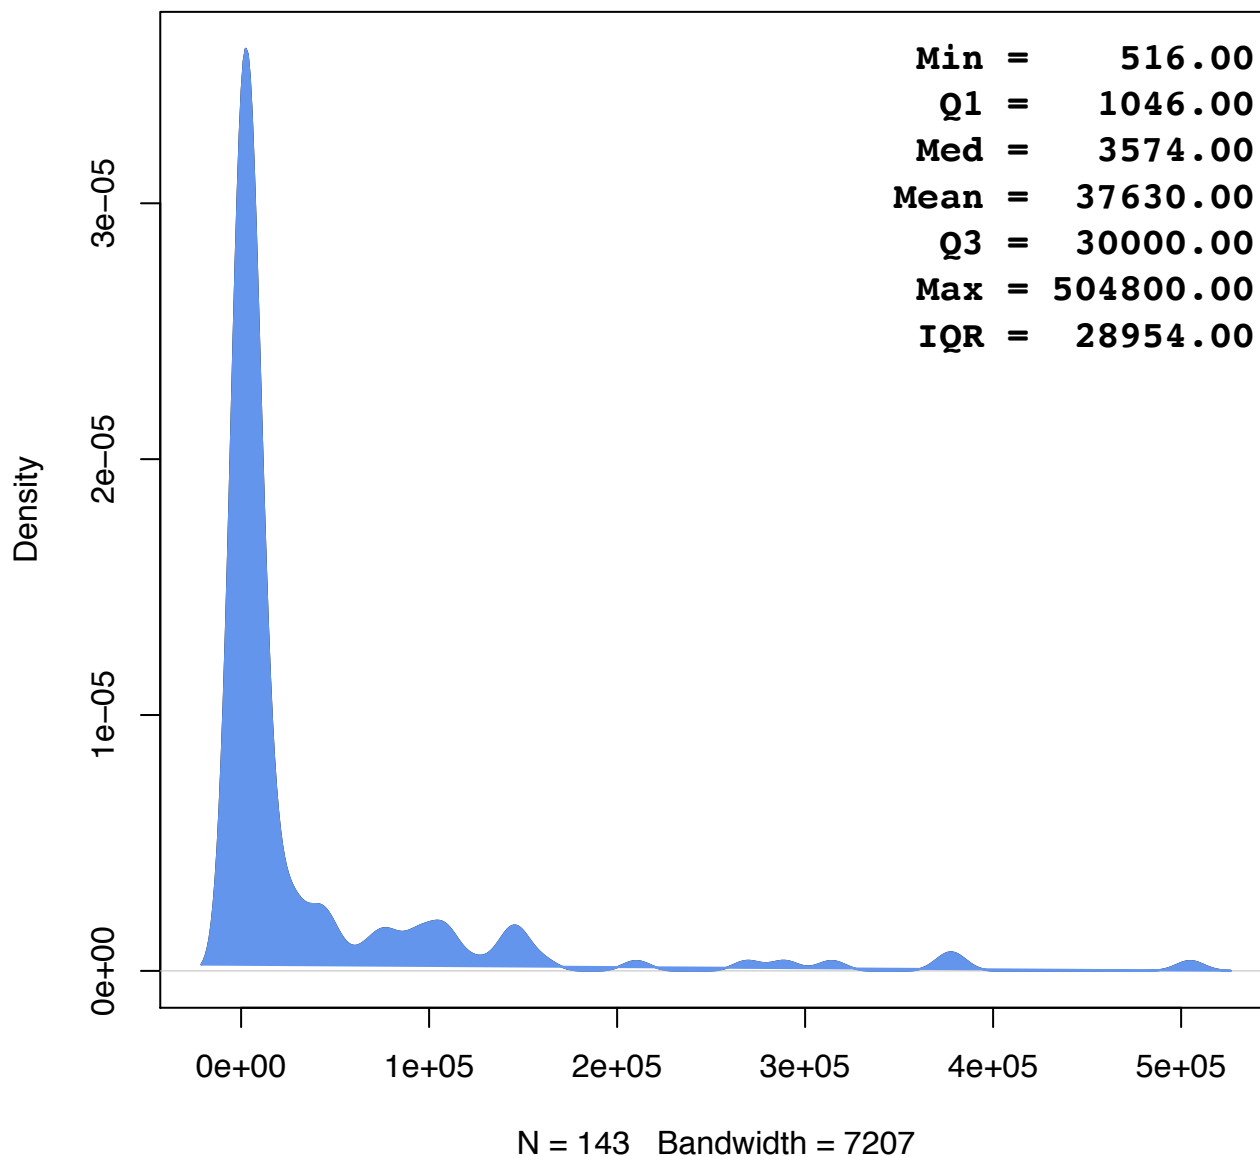

Density plot showing the distribution of sequence lengths for the *Escherichia coli* genome. A summary is included in the upper, right-hand corner.

Supplementary Figure 6. *Zaire ebolavirus* Sequence Length Density Plot

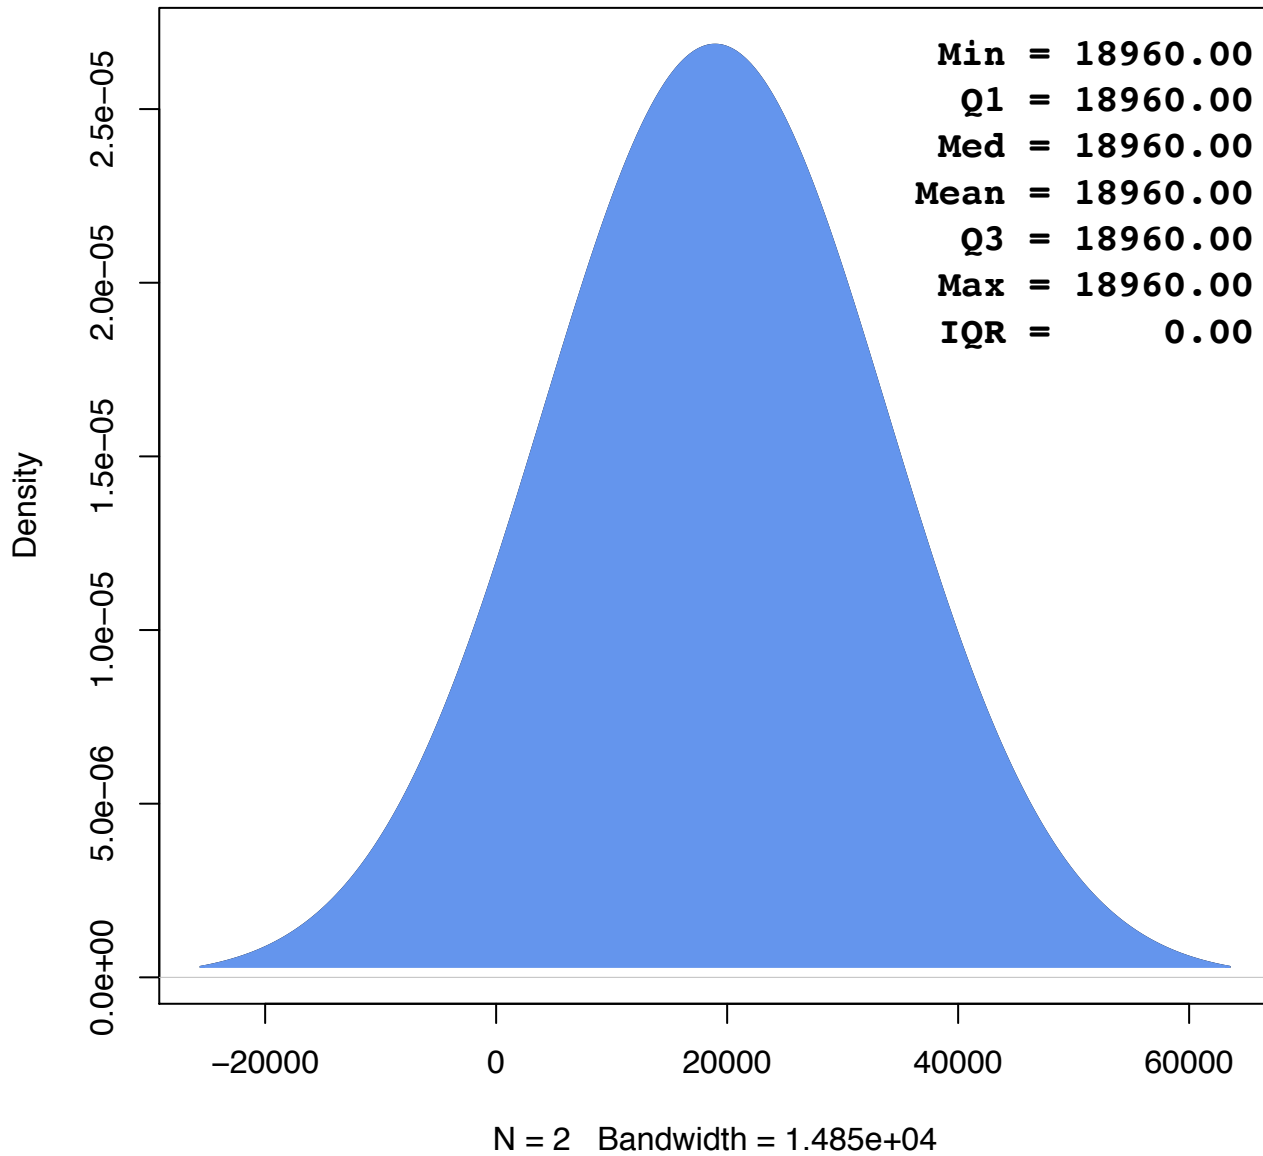

Density plot showing the distribution of sequence lengths for the *Zaire ebolavirus* genome. A summary is included in the upper, right-hand corner.

## Supplementary Table 1. Algorithms Included in Comparisons

| Algorithm                           |
|-------------------------------------|
| GMATo (Wang, et al., 2013)          |
| MREPS (Kolpakov, et al., 2003)      |
| PRoGeRF (Lopes, et al., 2015)       |
| QDD (Megléc, et al., 2014)          |
| SSR-Pipeline (Miller, et al., 2013) |
| SSRIT (Temnykh, et al., 2001)       |
| TRF (Benson, 1999)                  |

We compared our algorithm to existing algorithms that (a) were capable of processing the *Drosophila melanogaster genome* dataset (see the main text), (b) had a non-interactive, Linux, command-line interface, (c) were freely available for immediate download, and (d) had 10 or more citations per year (based on publication date and Google Scholar citation count) or were published in the last three years. A few other algorithms met our requirements, but were rendered unusable due to antiquated shared libraries, compile- or run-time errors, or other issues.



**Supplementary Table 2. Performance Comparison**

|                                        |              | Comparison with SA-SSR           |                                   |               |                            |                             |                 |                                 |                  |             |
|----------------------------------------|--------------|----------------------------------|-----------------------------------|---------------|----------------------------|-----------------------------|-----------------|---------------------------------|------------------|-------------|
|                                        |              | CPU Time <sup>a</sup><br>(mm:ss) | Real Time <sup>a</sup><br>(mm:ss) | SSRs Reported | SSRs In Range <sup>b</sup> | Number Correct <sup>c</sup> | Percent Correct | SSRs                            |                  |             |
|                                        |              |                                  |                                   |               |                            |                             |                 | Unique to Software <sup>d</sup> | Unique to SA-SSR | SSRs Shared |
| <i>Arabidopsis thaliana</i><br>(chr 4) | GMATo        | 312:29                           | 312:29                            | 27,511,385    | 8,667                      | 0                           | 0               | 0                               | 2,265            | 0           |
|                                        | MREPS        | 386:15                           | 386:15                            | 4,201         | 1,608                      | 1,608                       | 100             | 2                               | 668              | 1,597       |
|                                        | PRoGeRF      | 9:23                             | 9:23                              | 4,116,484     | 1,599                      | 1,599                       | 100             | 2                               | 698              | 1,567       |
|                                        | QDD          | 2:02                             | 2:02                              | 3,965         | 1,100                      | 1,100                       | 100             | 0                               | 1,167            | 1,098       |
|                                        | SA-SSR       | 28,066:12                        | 2,338:47                          | 2,265         | 2,265                      | 2,265                       | 100             | NA                              | NA               | NA          |
|                                        | SSR-Pipeline | 1,395:04                         | 1,395:04                          | 4,754,929     | 1,580                      | 1,580                       | 100             | 2                               | 769              | 1,496       |
|                                        | SSRIT        | 0:10                             | 0:10                              | 900           | 900                        | 900                         | 100             | 0                               | 1,372            | 893         |
|                                        | TRF          | 0:47                             | 0:47                              | 135,135       | 7,505                      | 1,527                       | 20.35           | 1                               | 862              | 1,403       |
| <i>Caenorhabditis elegans</i>          | GMATo        | 9:39                             | 9:39                              | 22,889,822    | 5,551                      | 5,551                       | 100             | 20                              | 4,663            | 3,260       |
|                                        | MREPS        | 4:34                             | 4:34                              | 18,958        | 7,440                      | 7,440                       | 100             | 26                              | 567              | 7,356       |
|                                        | PRoGeRF      | 744:21                           | 744:21                            | 531,822       | 99                         | 99                          | 100             | 0                               | 7,826            | 97          |
|                                        | QDD          | 10:32                            | 10:32                             | 11,720        | 3,379                      | 3,379                       | 100             | 6                               | 4,560            | 3,363       |
|                                        | SA-SSR       | 645:54                           | 60:31                             | 7,923         | 7,923                      | 7,923                       | 100             | NA                              | NA               | NA          |
|                                        | SSR-Pipeline | 13:14                            | 13:14                             | 26,475,821    | 7,305                      | 7,305                       | 100             | 24                              | 904              | 7,019       |
|                                        | SSRIT        | 0:57                             | 0:57                              | 2,374         | 2,374                      | 2,374                       | 100             | 3                               | 5,566            | 2,357       |
|                                        | TRF          | 7:20                             | 7:20                              | 1,029,051     | 31,500                     | 6,174                       | 19.60           | 6                               | 2,649            | 5,274       |
| <i>Drosophila melanogaster</i>         | GMATo        | 6:31                             | 6:31                              | 21,180,679    | 1,053                      | 1,053                       | 100             | 0                               | 27,294           | 586         |
|                                        | MREPS        | 1:47                             | 1:47                              | 52,347        | 28,009                     | 28,009                      | 100             | 43                              | 104              | 27,776      |
|                                        | PRoGeRF      | 2,436:55                         | 2,436:55                          | 470,382       | 576                        | 566                         | 98.26           | 0                               | 27,324           | 556         |
|                                        | QDD          | 11:11                            | 11:11                             | 37,525        | 12,931                     | 12,931                      | 100             | 4                               | 15,012           | 12,868      |
|                                        | SA-SSR       | 52:58                            | 4:52                              | 27,880        | 27,880                     | 27,880                      | 100             | NA                              | NA               | NA          |
|                                        | SSR-Pipeline | 1:47                             | 1:47                              | 29,015,430    | 27,513                     | 27,513                      | 100             | 42                              | 1,354            | 26,526      |
|                                        | SSRIT        | 1:02                             | 1:02                              | 9,943         | 9,943                      | 9,943                       | 100             | 2                               | 17,993           | 9,887       |
|                                        | TRF          | 4:01                             | 4:01                              | 856,363       | 108,070                    | 26,156                      | 24.20           | 5                               | 3,911            | 23,969      |
| <i>Escherichia coli</i>                | GMATo        | 0:39                             | 0:39                              | 1,127,792     | 13                         | 13                          | 100             | 0                               | 15               | 5           |
|                                        | MREPS        | 0:26                             | 0:26                              | 46            | 19                         | 19                          | 100             | 0                               | 1                | 19          |
|                                        | PRoGeRF      | 3:36                             | 3:36                              | 334,091       | 4                          | 4                           | 100             | 0                               | 16               | 4           |
|                                        | QDD          | 0:32                             | 0:32                              | 38            | 8                          | 8                           | 100             | 0                               | 20               | 0           |
|                                        | SA-SSR       | 55:07                            | 12:21                             | 20            | 20                         | 20                          | 100             | NA                              | NA               | NA          |
|                                        | SSR-Pipeline | 1:15                             | 1:15                              | 93,025        | 0                          | 0                           | NA              | 0                               | 20               | 0           |
|                                        | SSRIT        | 0:03                             | 0:03                              | 0             | 0                          | 0                           | NA              | 0                               | 20               | 0           |
|                                        | TRF          | 0:06                             | 0:06                              | 15,107        | 209                        | 19                          | 9.09            | 0                               | 1                | 19          |
| <i>Zaire ebolavirus</i>                | GMATo        | 0:00                             | 0:00                              | 4,180         | 0                          | 0                           | NA              | NA                              | NA               | NA          |
|                                        | MREPS        | 0:00                             | 0:00                              | 0             | 0                          | 0                           | NA              | NA                              | NA               | NA          |
|                                        | PRoGeRF      | 0:03                             | 0:03                              | 4,350         | 0                          | 0                           | NA              | NA                              | NA               | NA          |
|                                        | QDD          | 0:00                             | 0:00                              | 0             | 0                          | 0                           | NA              | NA                              | NA               | NA          |
|                                        | SA-SSR       | 0:01                             | 0:01                              | 0             | 0                          | 0                           | NA              | NA                              | NA               | NA          |
|                                        | SSR-Pipeline | 0:01                             | 0:01                              | 4,862         | 0                          | 0                           | NA              | NA                              | NA               | NA          |
|                                        | SSRIT        | 0:00                             | 0:00                              | 0             | 0                          | 0                           | NA              | NA                              | NA               | NA          |
|                                        | TRF          | 0:00                             | 0:00                              | 59            | 0                          | 0                           | NA              | NA                              | NA               | NA          |
| Combined                               | GMATo        | 329:18                           | 329:18                            | 72,713,858    | 15,284                     | 6,617                       | 43.29           | 20                              | 34,237           | 3,851       |
|                                        | MREPS        | 393:02                           | 393:02                            | 75,552        | 37,076                     | 37,076                      | 100             | 71                              | 1,340            | 36,748      |
|                                        | PRoGeRF      | 3,194:18                         | 3,194:18                          | 5,457,129     | 2,278                      | 2,268                       | 99.56           | 2                               | 35,864           | 2,224       |
|                                        | QDD          | 24:17                            | 24:17                             | 53,248        | 17,418                     | 17,418                      | 100             | 10                              | 20,759           | 17,329      |
|                                        | SA-SSR       | 28,820:12                        | 2,416:32                          | 38,088        | 38,088                     | 38,088                      | 100             | NA                              | NA               | NA          |
|                                        | SSR-Pipeline | 1,411:21                         | 1,411:21                          | 60,344,067    | 36,398                     | 36,398                      | 100             | 68                              | 3,047            | 35,041      |
|                                        | SSRIT        | 2:12                             | 2:12                              | 13,217        | 13,217                     | 13,217                      | 100             | 5                               | 24,951           | 13,137      |
|                                        | TRF          | 12:14                            | 12:14                             | 2,035,715     | 147,284                    | 33,876                      | 23.00           | 12                              | 7,423            | 30,665      |

<sup>a</sup> MREPS timing includes the pre- and post-processing time for each genome necessary to adjust positions to account for removing "incorrect symbols" and Ns. The additional times are an average of multiple approaches.

<sup>b</sup> We only considered SSRs with period sizes 1-7 (inclusive) and lengths of at least 16 nucleotides (nt). The difference between the number of SSRs in range and reported is due exclusively to SSR length (less than 16 nt) and period size (greater than 7).

<sup>c</sup> Whenever possible, we salvaged correct SSRs that were inside incorrect SSRs reported by other software packages. For example, in *Drosophila melanogaster*, we recovered three for PRoGeRF and 8,408 for TRF. To illustrate, in sequence JXOZ01000043.1, TRF reports a CT repeated 36 times at position 2,171. While TRF does correctly identify a low-complexity region with many CT repeats, there are not 36 perfect repeats in a row. In this case, we salvaged two perfect CT regions, each repeating 8 times.

<sup>d</sup> Detailed pairwise comparisons can be found in Supplementary Tables 4-31.

**Supplementary Table 3.** Features of Software for Finding SSRs

|                     | Op. Sys. |          |       | Format |     |       | Complexity |             |                     |         |                                  |        |        | Search for Specific SSRs |         |                    |                   |
|---------------------|----------|----------|-------|--------|-----|-------|------------|-------------|---------------------|---------|----------------------------------|--------|--------|--------------------------|---------|--------------------|-------------------|
|                     | MS Win   | Mac OS X | Linux | CLI    | GUI | Input | Output     | Language    | Algorithm           | Type    | Time                             | Space  | Period |                          | Repeats | Multi-threaded     | Ignore Characters |
| <b>SA-SSR</b>       |          |          | X     | X      |     | FASTA | TSV        | C++         | Combinatorial       | Exact   | $O(n)$                           | $O(n)$ | 1+     | 2+                       | X       | Yes (Configurable) | X                 |
| <b>GMATo</b>        | X        | X        | X     | X      | X   | FASTA | TSV        | Perl & Java | Regular Expressions | Exact   | ?                                | ?      | 1-10   | 2+                       |         | Yes (default)      |                   |
| <b>MREPS</b>        |          |          | X     | X      |     | FASTA | Text       | C           | Combinatorial       | Inexact | $O(nk \cdot \log(n/k) + S)$      | ?      | 1+     | 2+                       |         | Yes (only some Ns) |                   |
| <b>PRoGeRF</b>      |          |          | X     | X      | Web | FASTA | TSV        | Perl        | ?                   | Inexact | ?                                | ?      | 1-12   | 2+                       |         | Yes (default)      |                   |
| <b>QDD</b>          | X        |          | X     | X      |     | FASTA | SCSV       | Perl        | ?                   | Exact   | ?                                | ?      | ?      | 2+                       |         | Yes (default)      |                   |
| <b>SSR-Pipeline</b> | X        | X        | X     | X      |     | FASTA | FASTA      | Python      | ?                   | Exact   | ?                                | ?      | 2-25   | 2+                       |         | Yes (default)      |                   |
| <b>SSRIT</b>        |          |          | X     | X      |     | FASTA | TSV        | Perl        | Regular Expressions | Exact   | ?                                | ?      | ?      | 2+                       |         | Yes (default)      |                   |
| <b>TRF</b>          | X        | X        | X     | X      | X   | FASTA | Text       | ?           | Heuristic           | Inexact | $O(n^2 \cdot \text{polylog}(n))$ | ?      | 1+     | 2+                       |         | Yes (default)      |                   |

**Supplementary Table 4.** SA-SSR compared with GMATo for *Arabidopsis thaliana*

|        | <b>1</b> | <b>2</b> | <b>3</b> | <b>4</b> | <b>5</b> | <b>6</b> | <b>7</b> | <b>Total</b> |
|--------|----------|----------|----------|----------|----------|----------|----------|--------------|
| GMATo  | 0        | 0        | 0        | 0        | 0        | 0        | 0        | <b>0</b>     |
| SA-SSR | 660      | 721      | 343      | 126      | 60       | 245      | 110      | <b>2265</b>  |
| Shared | 0        | 0        | 0        | 0        | 0        | 0        | 0        | <b>0</b>     |

The number of SSRs in the *Arabidopsis thaliana* chromosome 4 found unique to GMATo, unique to SA-SSR, and shared between the two using the following parameter set: -l 1 -L 18600000 -m 1 -M 7 -n 16 -r 1 -i D,M,N. Any SSRs with period size greater than 7, with total length less than 16nt, or that were incorrect were excluded from this comparison.

**Supplementary Table 5.** SA-SSR compared with MREPS for *Arabidopsis thaliana*

|            |        | <b>1</b> | <b>2</b> | <b>3</b> | <b>4</b> | <b>5</b> | <b>6</b> | <b>7</b> | <b>Total</b> |
|------------|--------|----------|----------|----------|----------|----------|----------|----------|--------------|
| Normal     | MREPS  | 0        | 5        | 1        | 2        | 1        | 2        | 0        | <b>11</b>    |
|            | SA-SSR | 660      | 5        | 1        | 1        | 0        | 1        | 0        | <b>668</b>   |
|            | Shared | 0        | 716      | 342      | 125      | 60       | 244      | 110      | <b>1597</b>  |
| Overlap    | MREPS  | 0        | 0        | 0        | 0        | 1        | 1        | 0        | <b>2</b>     |
|            | SA-SSR | 2742     | 6064     | 2171     | 322      | 134      | 553      | 535      | <b>12521</b> |
|            | Shared | 0        | 721      | 343      | 127      | 60       | 245      | 110      | <b>1606</b>  |
| Exhaustive | MREPS  | 0        | 0        | 0        | 0        | 0        | 0        | 0        | <b>0</b>     |
|            | SA-SSR | 2752     | 8824     | 3761     | 9867     | 1029     | 10115    | 1194     | <b>37542</b> |
|            | Shared | 0        | 721      | 343      | 127      | 61       | 246      | 110      | <b>1608</b>  |

The number of SSRs in the *Arabidopsis thaliana* chromosome 4 found unique to MREPS, unique to SA-SSR, and shared between the two using three different sets of parameters for SA-SSR. The normal parameter set was as follows: -l 1 -L 18600000 -m 1 -M 7 -n 16 -r 1 -i D,M,N. The overlap set was identical to normal with the following addition: -o. The exhaustive set was identical to overlap with the following addition: -e. Any SSRs with period size greater than 7, with total length less than 16nt, or that were incorrect were excluded from this comparison.

Why did SA-SSR not find the 11 SSRs that MREPS found uniquely? By default, SA-SSR reports only one SSR when multiple may be found in an overlapping location. 9 of the 11 were also found by SA-SSR when this default behavior is changed to report every SSR, even though they overlap. Naturally, the number of unique SSRs found by SA-SSR as reported using the overlap parameter set is inflated as a result. The remaining 2 SSRs were also found by SA-SSR, but only when using the exhaustive approach because of a special, rare case involving the specific sequence and suffix sort order. The number of unique SSRs found by SA-SSR as reported using the exhaustive parameter set is also inflated.

**Supplementary Table 6.** SA-SSR compared with ProGeRF for *Arabidopsis thaliana*

|                   |         | <b>1</b> | <b>2</b> | <b>3</b> | <b>4</b> | <b>5</b> | <b>6</b> | <b>7</b> | <b>Total</b> |
|-------------------|---------|----------|----------|----------|----------|----------|----------|----------|--------------|
| <b>Normal</b>     | ProGeRF | 0        | 5        | 6        | 3        | 2        | 16       | 0        | <b>32</b>    |
|                   | SA-SSR  | 660      | 7        | 21       | 5        | 1        | 4        | 0        | <b>698</b>   |
|                   | Shared  | 0        | 714      | 322      | 121      | 59       | 241      | 110      | <b>1567</b>  |
| <b>Overlap</b>    | ProGeRF | 0        | 0        | 0        | 0        | 1        | 15       | 0        | <b>16</b>    |
|                   | SA-SSR  | 2742     | 6066     | 2186     | 325      | 134      | 556      | 535      | <b>12544</b> |
|                   | Shared  | 0        | 719      | 328      | 124      | 60       | 242      | 110      | <b>1583</b>  |
| <b>Exhaustive</b> | ProGeRF | 0        | 0        | 0        | 0        | 0        | 0        | 0        | <b>0</b>     |
|                   | SA-SSR  | 2752     | 8826     | 3776     | 9870     | 1029     | 10104    | 1194     | <b>37551</b> |
|                   | Shared  | 0        | 719      | 328      | 124      | 61       | 257      | 110      | <b>1599</b>  |

The number of SSRs in the *Arabidopsis thaliana* chromosome 4 found unique to ProGeRF, unique to SA-SSR, and shared between the two using three different sets of parameters for SA-SSR. The normal parameter set was as follows: -l 1 -L 18600000 -m 1 -M 7 -n 16 -r 1 -i D,M,N. The overlap set was identical to normal with the following addition: -o. The exhaustive set was identical to overlap with the following addition: -e. Any SSRs with period size greater than 7, with total length less than 16nt, or that were incorrect were excluded from this comparison.

Why did SA-SSR not find the 32 SSRs that ProGeRF found uniquely? By default, SA-SSR reports only one SSR when multiple may be found in an overlapping location. 16 of the 32 were also found by SA-SSR when this default behavior is changed to report every SSR, even though they overlap. Naturally, the number of unique SSRs found by SA-SSR as reported using the overlap parameter set is inflated as a result. 14 of the remaining 16 SSRs were also found by SA-SSR, but SA-SSR correctly reported shorter period lengths than ProGeRF did. Obviously, reporting a longer period length than is strictly necessary to describe the SSR is misleading and certainly incorrect. AAAAAAAAAA has a period size of one repeated nine times, not three repeated three times. Likewise, ATATATAT has a period size of two repeated four times, not four repeated two times. The last 2 SSRs were also found by SA-SSR, but only when using the exhaustive approach because of a special, rare case involving the specific sequence and suffix sort order. The number of unique SSRs found by SA-SSR as reported using the exhaustive parameter set is also inflated.

**Supplementary Table 7.** SA-SSR compared with QDD for *Arabidopsis thaliana*

|                |        | <b>1</b> | <b>2</b> | <b>3</b> | <b>4</b> | <b>5</b> | <b>6</b> | <b>7</b> | <b>Total</b> |
|----------------|--------|----------|----------|----------|----------|----------|----------|----------|--------------|
| <b>Normal</b>  | QDD    | 0        | 2        | 0        | 0        | 0        | 0        | 0        | <b>2</b>     |
|                | SA-SSR | 660      | 2        | 1        | 99       | 55       | 240      | 110      | <b>1167</b>  |
|                | Shared | 0        | 719      | 342      | 27       | 5        | 5        | 0        | <b>1098</b>  |
| <b>Overlap</b> | QDD    | 0        | 0        | 0        | 0        | 0        | 0        | 0        | <b>0</b>     |
|                | SA-SSR | 2742     | 6064     | 2172     | 422      | 189      | 793      | 645      | <b>13027</b> |
|                | Shared | 0        | 721      | 342      | 27       | 5        | 5        | 0        | <b>1100</b>  |

The number of SSRs in the *Arabidopsis thaliana* chromosome 4 found unique to QDD, unique to SA-SSR, and shared between the two using two different sets of parameters for SA-SSR. The normal parameter set was as follows: -l 1 -L 18600000 -m 1 -M 7 -n 16 -r 1 -i D,M,N. The overlap set was identical to normal with the following addition: -o. Any SSRs with period size greater than 7, with total length less than 16nt, or that were incorrect were excluded from this comparison.

Why did SA-SSR not find the 2 SSRs that QDD found uniquely? By default, SA-SSR reports only one SSR when multiple may be found in an overlapping location. Both were also found by SA-SSR when this default behavior is changed to report every SSR, even though they overlap. Naturally, the number of unique SSRs found by SA-SSR as reported using the overlap parameter set is inflated as a result.

**Supplementary Table 8.** SA-SSR compared with SSR-Pipeline for *Arabidopsis thaliana*

|            |              | <b>1</b> | <b>2</b> | <b>3</b> | <b>4</b> | <b>5</b> | <b>6</b> | <b>7</b> | <b>Total</b> |
|------------|--------------|----------|----------|----------|----------|----------|----------|----------|--------------|
| Normal     | SSR-Pipeline | 0        | 47       | 16       | 7        | 1        | 7        | 6        | <b>84</b>    |
|            | SA-SSR       | 660      | 59       | 26       | 9        | 0        | 8        | 7        | <b>769</b>   |
|            | Shared       | 0        | 662      | 317      | 117      | 60       | 237      | 103      | <b>1496</b>  |
| Overlap    | SSR-Pipeline | 0        | 0        | 0        | 0        | 1        | 2        | 0        | <b>3</b>     |
|            | SA-SSR       | 2742     | 6076     | 2181     | 325      | 134      | 556      | 536      | <b>12550</b> |
|            | Shared       | 0        | 709      | 333      | 124      | 60       | 242      | 109      | <b>1577</b>  |
| Exhaustive | SSR-Pipeline | 0        | 0        | 0        | 0        | 0        | 0        | 0        | <b>0</b>     |
|            | SA-SSR       | 2752     | 8836     | 3771     | 9870     | 1029     | 10117    | 1195     | <b>37570</b> |
|            | Shared       | 0        | 709      | 333      | 124      | 61       | 244      | 109      | <b>1580</b>  |

The number of SSRs in the *Arabidopsis thaliana* chromosome 4 found unique to SSR-Pipeline, unique to SA-SSR, and shared between the two using three different sets of parameters for SA-SSR. The normal parameter set was as follows: -l 1 -L 18600000 -m 1 -M 7 -n 16 -r 1 -i D,M,N. The overlap set was identical to normal with the following addition: -o. The exhaustive set was identical to overlap with the following addition: -e. Any SSRs with period size greater than 7, with total length less than 16nt, or that were incorrect were excluded from this comparison.

Why did SA-SSR not find the 84 SSRs that SSR-Pipeline found uniquely? By default, SA-SSR reports only one SSR when multiple may be found in an overlapping location. 81 of the 84 were also found by SA-SSR when this default behavior is changed to report every SSR, even though they overlap. Naturally, the number of unique SSRs found by SA-SSR as reported using the overlap parameter set is inflated as a result. One of the remaining 3 SSRs was just a different SSR base, but covering essentially the same SSR (AATAAA vs AAAATA). The remaining 2 SSRs were also found by SA-SSR, but only when using the exhaustive approach because of a special, rare case involving the specific sequence and suffix sort order. The number of unique SSRs found by SA-SSR as reported using the exhaustive parameter set is also inflated.

**Supplementary Table 9.** SA-SSR compared with SSRIT for *Arabidopsis thaliana*

|         |        | <b>1</b> | <b>2</b> | <b>3</b> | <b>4</b> | <b>5</b> | <b>6</b> | <b>7</b> | <b>Total</b> |
|---------|--------|----------|----------|----------|----------|----------|----------|----------|--------------|
| Normal  | SSRIT  | 0        | 5        | 1        | 1        | 0        | 0        | 0        | <b>7</b>     |
|         | SA-SSR | 660      | 198      | 1        | 98       | 60       | 245      | 110      | <b>1372</b>  |
|         | Shared | 0        | 523      | 342      | 28       | 0        | 0        | 0        | <b>893</b>   |
| Overlap | SSRIT  | 0        | 0        | 0        | 0        | 0        | 0        | 0        | <b>0</b>     |
|         | SA-SSR | 2742     | 6257     | 2171     | 420      | 194      | 798      | 645      | <b>13227</b> |
|         | Shared | 0        | 528      | 343      | 29       | 0        | 0        | 0        | <b>900</b>   |

The number of SSRs in the *Arabidopsis thaliana* chromosome 4 found unique to SSRIT, unique to SA-SSR, and shared between the two using two different sets of parameters for SA-SSR. The normal parameter set was as follows: -l 1 -L 18600000 -m 1 -M 7 -n 16 -r 1 -i D,M,N. The overlap set was identical to normal with the following addition: -o. Any SSRs with period size greater than 7, with total length less than 16nt, or that were incorrect were excluded from this comparison.

Why did SA-SSR not find the 7 SSRs that SSRIT found uniquely? By default, SA-SSR reports only one SSR when multiple may be found in an overlapping location. All 7 were also found by SA-SSR when this default behavior is changed to report every SSR, even though they overlap. Naturally, the number of unique SSRs found by SA-SSR as reported using the overlap parameter set is inflated as a result.



**Supplementary Table 10.** SA-SSR compared with TRF for *Arabidopsis thaliana*

|            |        | 1    | 2    | 3    | 4    | 5    | 6     | 7    | Total        |
|------------|--------|------|------|------|------|------|-------|------|--------------|
| Normal     | TRF    | 0    | 48   | 26   | 9    | 2    | 14    | 25   | <b>124</b>   |
|            | SA-SSR | 660  | 67   | 41   | 13   | 3    | 42    | 36   | <b>862</b>   |
|            | Shared | 0    | 654  | 302  | 113  | 57   | 203   | 74   | <b>1403</b>  |
| Overlap    | TRF    | 0    | 1    | 3    | 5    | 0    | 3     | 1    | <b>13</b>    |
|            | SA-SSR | 2742 | 6084 | 2189 | 332  | 135  | 584   | 547  | <b>12613</b> |
|            | Shared | 0    | 701  | 325  | 117  | 59   | 214   | 98   | <b>1514</b>  |
| Exhaustive | TRF    | 0    | 1    | 3    | 0    | 0    | 1     | 1    | <b>6</b>     |
|            | SA-SSR | 2752 | 8844 | 3779 | 9872 | 1031 | 10145 | 1206 | <b>37629</b> |
|            | Shared | 0    | 701  | 325  | 122  | 59   | 216   | 98   | <b>1521</b>  |

The number of SSRs in the *Arabidopsis thaliana* chromosome 4 found unique to TRF, unique to SA-SSR, and shared between the two using three different sets of parameters for SA-SSR. The normal parameter set was as follows: -l 1 -L 18600000 -m 1 -M 7 -n 16 -r 1 -i D,M,N. The overlap set was identical to normal with the following addition: -o. The exhaustive set was identical to overlap with the following addition: -e. Any SSRs with period size greater than 7, with total length less than 16nt, or that were incorrect were excluded from this comparison.

Why did SA-SSR not find the 124 SSRs that TRF found uniquely? By default, SA-SSR reports only one SSR when multiple may be found in an overlapping location. 111 of the 124 were also found by SA-SSR when this default behavior is changed to report every SSR, even though they overlap. Naturally, the number of unique SSRs found by SA-SSR as reported using the overlap parameter set is inflated as a result. The remaining 13 SSRs were also found by SA-SSR and they fall into three different categories. The categories are overstated period size, finding different numbers of repeats, and special cases requiring the exhaustive approach by SA-SSR. 6 of the 13 are cases where TRF overstated the period size (e.g., calling ATATATAT a 4-mer instead of a 2-mer). Obviously, reporting a longer period length than is strictly necessary to describe the SSR is misleading and certainly incorrect. AAAAAAAAAA has a period size of one repeated nine times, not three repeated three times. Likewise, ATATATAT has a period size of two repeated four times, not four repeated two times. Of the remaining 7, the 6 that were not found even under the exhaustive approach were actually found by SA-SSR, but SA-SSR correctly reported a larger number of repeats. So, while it appeared that SA-SSR didn't find them, it actually did. For these 6, both are correct, but SA-SSR is more complete. Finally, the last of the 7 was found during the exhaustive approach and is a special, rare case involving the specific sequence and suffix sort. Of course, the number of unique SSRs found by SA-SSR as reported using the exhaustive parameter set is also inflated.

**Supplementary Table 11.** SA-SSR compared with GMATo for *Caenorhabditis elegans*

|            |        | <b>1</b> | <b>2</b> | <b>3</b> | <b>4</b> | <b>5</b> | <b>6</b> | <b>7</b> | <b>Total</b> |
|------------|--------|----------|----------|----------|----------|----------|----------|----------|--------------|
| Normal     | GMATo  | 0        | 687      | 220      | 248      | 55       | 807      | 274      | <b>2291</b>  |
|            | SA-SSR | 522      | 866      | 428      | 601      | 130      | 1551     | 565      | <b>4663</b>  |
|            | Shared | 0        | 1032     | 415      | 393      | 50       | 1097     | 273      | <b>3260</b>  |
| Overlap    | GMATo  | 0        | 3        | 0        | 5        | 0        | 12       | 1        | <b>21</b>    |
|            | SA-SSR | 1862     | 13378    | 2802     | 4084     | 661      | 16224    | 5361     | <b>44372</b> |
|            | Shared | 0        | 1716     | 635      | 636      | 105      | 1892     | 546      | <b>5530</b>  |
| Exhaustive | GMATo  | 0        | 0        | 0        | 0        | 0        | 0        | 0        | <b>0</b>     |
|            | SA-SSR | 1862     | 15261    | 3803     | 21089    | 1258     | 32453    | 5858     | <b>81584</b> |
|            | Shared | 0        | 1719     | 635      | 641      | 105      | 1904     | 547      | <b>5551</b>  |

The number of SSRs in the *Caenorhabditis elegans* genome found unique to GMATo, unique to SA-SSR, and shared between the two using three different sets of parameters for SA-SSR. The normal parameter set was as follows: -l 1 -L 700000 -m 1 -M 7 -n 16 -r 1 -i N. The overlap set was identical to normal with the following addition: -o. The exhaustive set was identical to overlap with the following addition: -e. Any SSRs with period size greater than 7, with total length less than 16nt, or that were incorrect were excluded from this comparison.

Why did SA-SSR not find the 2291 SSRs that GMATo found uniquely? By default, SA-SSR reports only one SSR when multiple may be found in an overlapping location. 2270 of the 2291 were also found by SA-SSR when this default behavior is changed to report every SSR, even though they overlap. Naturally, the number of unique SSRs found by SA-SSR as reported using the overlap parameter set is inflated as a result. One of the remaining 21 SSRs were also found by SA-SSR, but SA-SSR correctly reported a greater number of repeats than GMATo did. Finally, the last 20 were also found by SA-SSR, but only when using the exhaustive approach because of a special, rare case involving the specific sequence and suffix sort order. The number of unique SSRs found by SA-SSR as reported using the exhaustive parameter set is also inflated.

**Supplementary Table 12.** SA-SSR compared with MREPS for *Caenorhabditis elegans*

|            |        | <b>1</b> | <b>2</b> | <b>3</b> | <b>4</b> | <b>5</b> | <b>6</b> | <b>7</b> | <b>Total</b> |
|------------|--------|----------|----------|----------|----------|----------|----------|----------|--------------|
| Normal     | MREPS  | 0        | 11       | 3        | 16       | 0        | 39       | 15       | <b>84</b>    |
|            | SA-SSR | 522      | 6        | 0        | 8        | 0        | 22       | 9        | <b>567</b>   |
|            | Shared | 0        | 1892     | 843      | 986      | 180      | 2626     | 829      | <b>7356</b>  |
| Overlap    | MREPS  | 0        | 5        | 1        | 8        | 0        | 14       | 2        | <b>30</b>    |
|            | SA-SSR | 1862     | 13196    | 2592     | 3726     | 586      | 15465    | 5065     | <b>42492</b> |
|            | Shared | 0        | 1898     | 845      | 994      | 180      | 2651     | 842      | <b>7410</b>  |
| Exhaustive | MREPS  | 0        | 0        | 0        | 0        | 0        | 0        | 0        | <b>0</b>     |
|            | SA-SSR | 1862     | 15077    | 3592     | 20728    | 1183     | 31692    | 5561     | <b>79695</b> |
|            | Shared | 0        | 1903     | 846      | 1002     | 180      | 2665     | 844      | <b>7440</b>  |

The number of SSRs in the *Caenorhabditis elegans* genome found unique to MREPS, unique to SA-SSR, and shared between the two using the three different parameter sets. The normal parameter set was as follows: -l 1 -L 700000 -m 1 -M 7 -n 16 -r 1 -i N. The overlap set was identical to normal with the following addition: -o. The exhaustive set was identical to overlap with the following addition: -e. Any SSRs with period size greater than 7, with total length less than 16nt, or that were incorrect were excluded from this comparison.

Why did SA-SSR not find the 84 SSRs that MREPS found uniquely? By default, SA-SSR reports only one SSR when multiple may be found in an overlapping location. 54 of the 84 were also found by SA-SSR when this default behavior is changed to report every SSR, even though they overlap. Naturally, the number of unique SSRs found by SA-SSR as reported using the overlap parameter set is inflated as a result. Four of the remaining 30 SSRs were also found by SA-SSR, but SA-SSR reported a different repeating unit than MREPS did (e.g., GT vs TG). Finally, the last 26 were also found by SA-SSR, but only when using the exhaustive approach because of a special, rare case involving the specific sequence and suffix sort order. The number of unique SSRs found by SA-SSR as reported using the exhaustive parameter set is also inflated.

**Supplementary Table 13.** SA-SSR compared with ProGeRF for *Caenorhabditis elegans*

|         |         | <b>1</b> | <b>2</b> | <b>3</b> | <b>4</b> | <b>5</b> | <b>6</b> | <b>7</b> | <b>Total</b> |
|---------|---------|----------|----------|----------|----------|----------|----------|----------|--------------|
| Normal  | ProGeRF | 0        | 0        | 0        | 0        | 0        | 1        | 1        | <b>2</b>     |
|         | SA-SSR  | 522      | 1871     | 833      | 971      | 179      | 2620     | 830      | <b>7826</b>  |
|         | Shared  | 0        | 27       | 10       | 23       | 1        | 28       | 8        | <b>97</b>    |
| Overlap | ProGeRF | 0        | 0        | 0        | 0        | 0        | 1        | 0        | <b>1</b>     |
|         | SA-SSR  | 1862     | 15067    | 3427     | 4697     | 765      | 18088    | 5898     | <b>49804</b> |
|         | Shared  | 0        | 27       | 10       | 23       | 1        | 28       | 9        | <b>98</b>    |

The number of SSRs in the *Caenorhabditis elegans* genome found unique to ProGeRF, unique to SA-SSR, and shared between the two using two different sets of parameters for SA-SSR. The normal parameter set was as follows: -l -L 700000 -m 1 -M 7 -n 16 -r 1 -i N. The overlap set was identical to normal with the following addition: -o. Any SSRs with period size greater than 7, with total length less than 16nt, or that were incorrect were excluded from this comparison.

Why did SA-SSR not find the 2 SSRs that ProGeRF found uniquely? By default, SA-SSR reports only one SSR when multiple may be found in an overlapping location. 1 of the 2 was also found by SA-SSR when this default behavior is changed to report every SSR, even though they overlap. Naturally, the number of unique SSRs found by SA-SSR as reported using the overlap parameter set is inflated as a result. The remaining SSR was also found by SA-SSR, but SA-SSR correctly reported shorter period lengths than ProGeRF did. Obviously, reporting a longer period length than is strictly necessary to describe the SSR is misleading and certainly incorrect. AAAAAAAAAA has a period size of one repeated nine times, not three repeated three times. Likewise, ATATATAT has a period size of two repeated four times, not four repeated two times.

**Supplementary Table 14.** SA-SSR compared with QDD for *Caenorhabditis elegans*

|                   |        | <b>1</b> | <b>2</b> | <b>3</b> | <b>4</b> | <b>5</b> | <b>6</b> | <b>7</b> | <b>Total</b> |
|-------------------|--------|----------|----------|----------|----------|----------|----------|----------|--------------|
| <b>Normal</b>     | QDD    | 0        | 8        | 1        | 4        | 0        | 3        | 0        | <b>16</b>    |
|                   | SA-SSR | 522      | 4        | 0        | 715      | 141      | 2340     | 838      | <b>4560</b>  |
|                   | Shared | 0        | 1894     | 843      | 279      | 39       | 308      | 0        | <b>3363</b>  |
| <b>Overlap</b>    | QDD    | 0        | 5        | 1        | 0        | 0        | 1        | 0        | <b>7</b>     |
|                   | SA-SSR | 1862     | 13197    | 2594     | 4437     | 727      | 17806    | 5907     | <b>46530</b> |
|                   | Shared | 0        | 1897     | 843      | 283      | 39       | 310      | 0        | <b>3372</b>  |
| <b>Exhaustive</b> | QDD    | 0        | 0        | 0        | 0        | 0        | 0        | 0        | <b>0</b>     |
|                   | SA-SSR | 1862     | 15078    | 3594     | 21447    | 1324     | 34046    | 6405     | <b>83756</b> |
|                   | Shared | 0        | 1902     | 844      | 283      | 39       | 311      | 0        | <b>3379</b>  |

The number of SSRs in the *Caenorhabditis elegans* genome found unique to QDD, unique to SA-SSR, and shared between the two using three different sets of parameters for SA-SSR. The normal parameter set was as follows: -l 1 -L 700000 -m 1 -M 7 -n 16 -r 1 -i N. The overlap set was identical to normal with the following addition: -o. The exhaustive set was identical to overlap with the following addition: -e. Any SSRs with period size greater than 7, with total length less than 16nt, or that were incorrect were excluded from this comparison.

Why did SA-SSR not find the 16 SSRs that QDD found uniquely? By default, SA-SSR reports only one SSR when multiple may be found in an overlapping location. 9 of the 16 were also found by SA-SSR when this default behavior is changed to report every SSR, even though they overlap. Naturally, the number of unique SSRs found by SA-SSR as reported using the overlap parameter set is inflated as a result. One of the remaining 7 was a case where the two programs correctly reported different repeating units (e.g., GT vs TG). The remaining 6 SSRs were also found by SA-SSR, but only when using the exhaustive approach because of a special, rare case involving the specific sequence and suffix sort order. The number of unique SSRs found by SA-SSR as reported using the exhaustive parameter set is also inflated.

**Supplementary Table 15.** SA-SSR compared with SSR-Pipeline for *Caenorhabditis elegans*

|                   |              | <b>1</b> | <b>2</b> | <b>3</b> | <b>4</b> | <b>5</b> | <b>6</b> | <b>7</b> | <b>Total</b> |
|-------------------|--------------|----------|----------|----------|----------|----------|----------|----------|--------------|
| <b>Normal</b>     | SSR-Pipeline | 0        | 116      | 31       | 38       | 1        | 87       | 13       | <b>286</b>   |
|                   | SA-SSR       | 522      | 141      | 53       | 56       | 3        | 115      | 14       | <b>904</b>   |
|                   | Shared       | 0        | 1757     | 790      | 938      | 177      | 2533     | 824      | <b>7019</b>  |
| <b>Overlap</b>    | SSR-Pipeline | 0        | 5        | 1        | 5        | 0        | 14       | 2        | <b>27</b>    |
|                   | SA-SSR       | 1862     | 13226    | 2617     | 3749     | 588      | 15510    | 5072     | <b>42624</b> |
|                   | Shared       | 0        | 1868     | 820      | 971      | 178      | 2606     | 835      | <b>7278</b>  |
| <b>Exhaustive</b> | SSR-Pipeline | 0        | 0        | 0        | 0        | 0        | 0        | 0        | <b>0</b>     |
|                   | SA-SSR       | 1862     | 15107    | 3617     | 20754    | 1185     | 31737    | 5568     | <b>79830</b> |
|                   | Shared       | 0        | 1873     | 821      | 976      | 178      | 2620     | 837      | <b>7305</b>  |

The number of SSRs in the *Caenorhabditis elegans* genome found unique to SSR-Pipeline, unique to SA-SSR, and shared between the two using three different sets of parameters for SA-SSR. The normal parameter set was as follows: -l 1 -L 700000 -m 1 -M 7 -n 16 -r 1 -i N. The overlap set was identical to normal with the following addition: -o. The exhaustive set was identical to overlap with the following addition: -e. Any SSRs with period size greater than 7, with total length less than 16nt, or that were incorrect were excluded from this comparison.

Why did SA-SSR not find the 286 SSRs that SSR-Pipeline found uniquely? By default, SA-SSR reports only one SSR when multiple may be found in an overlapping location. 259 of the 286 were also found by SA-SSR when this default behavior is changed to report every SSR, even though they overlap. Naturally, the number of unique SSRs found by SA-SSR as reported using the overlap parameter set is inflated as a result. Three of the remaining 27 were cases where the two programs correctly reported different repeating units (e.g., GT vs TG). The remaining 24 SSRs were also found by SA-SSR, but only when using the exhaustive approach because of a special, rare case involving the specific sequence and suffix sort order. The number of unique SSRs found by SA-SSR as reported using the exhaustive parameter set is also inflated.

**Supplementary Table 16.** SA-SSR compared with SSRIT for *Caenorhabditis elegans*

|            |        | <b>1</b> | <b>2</b> | <b>3</b> | <b>4</b> | <b>5</b> | <b>6</b> | <b>7</b> | <b>Total</b> |
|------------|--------|----------|----------|----------|----------|----------|----------|----------|--------------|
| Normal     | SSRIT  | 0        | 8        | 3        | 6        | 0        | 0        | 0        | <b>17</b>    |
|            | SA-SSR | 522      | 662      | 0        | 716      | 180      | 2648     | 838      | <b>5566</b>  |
|            | Shared | 0        | 1236     | 843      | 278      | 0        | 0        | 0        | <b>2357</b>  |
| Overlap    | SSRIT  | 0        | 2        | 1        | 0        | 0        | 0        | 0        | <b>3</b>     |
|            | SA-SSR | 1862     | 13852    | 2592     | 4436     | 766      | 18116    | 5907     | <b>47531</b> |
|            | Shared | 0        | 1242     | 845      | 284      | 0        | 0        | 0        | <b>2371</b>  |
| Exhaustive | SSRIT  | 0        | 0        | 0        | 0        | 0        | 0        | 0        | <b>0</b>     |
|            | SA-SSR | 1862     | 15736    | 3592     | 21446    | 1363     | 34357    | 6405     | <b>84761</b> |
|            | Shared | 0        | 1244     | 846      | 284      | 0        | 0        | 0        | <b>2374</b>  |

The number of SSRs in the *Caenorhabditis elegans* genome found unique to SSRIT, unique to SA-SSR, and shared between the two using three different sets of parameters for SA-SSR. The normal parameter set was as follows: -l 1 -L 700000 -m 1 -M 7 -n 16 -r 1 -i N. The overlap set was identical to normal with the following addition: -o. The exhaustive set was identical to overlap with the following addition: -e. Any SSRs with period size greater than 7, with total length less than 16nt, or that were incorrect were excluded from this comparison.

Why did SA-SSR not find the 17 SSRs that SSRIT found uniquely? By default, SA-SSR reports only one SSR when multiple may be found in an overlapping location. 14 of the 17 were also found by SA-SSR when this default behavior is changed to report every SSR, even though they overlap. Naturally, the number of unique SSRs found by SA-SSR as reported using the overlap parameter set is inflated as a result. The remaining 3 SSRs were also found by SA-SSR, but only when using the exhaustive approach because of a special, rare case involving the specific sequence and suffix sort order. The number of unique SSRs found by SA-SSR as reported using the exhaustive parameter set is also inflated.

**Supplementary Table 17.** SA-SSR compared with TRF for *Caenorhabditis elegans*

|                   |        | <b>1</b> | <b>2</b> | <b>3</b> | <b>4</b> | <b>5</b> | <b>6</b> | <b>7</b> | <b>Total</b> |
|-------------------|--------|----------|----------|----------|----------|----------|----------|----------|--------------|
| <b>Normal</b>     | TRF    | 0        | 99       | 46       | 77       | 11       | 537      | 130      | <b>900</b>   |
|                   | SA-SSR | 522      | 144      | 66       | 165      | 26       | 1443     | 283      | <b>2649</b>  |
|                   | Shared | 0        | 1754     | 777      | 829      | 154      | 1205     | 555      | <b>5274</b>  |
| <b>Overlap</b>    | TRF    | 0        | 9        | 8        | 10       | 3        | 17       | 2        | <b>49</b>    |
|                   | SA-SSR | 1862     | 13250    | 2622     | 3824     | 604      | 16391    | 5224     | <b>43777</b> |
|                   | Shared | 0        | 1844     | 815      | 896      | 162      | 1725     | 683      | <b>6125</b>  |
| <b>Exhaustive</b> | TRF    | 0        | 8        | 7        | 2        | 3        | 5        | 1        | <b>26</b>    |
|                   | SA-SSR | 1862     | 15135    | 3622     | 20826    | 1201     | 32620    | 5721     | <b>80987</b> |
|                   | Shared | 0        | 1845     | 816      | 904      | 162      | 1737     | 684      | <b>6148</b>  |

The number of SSRs in the *Caenorhabditis elegans* genome found unique to TRF, unique to SA-SSR, and shared between the two using three different sets of parameters for SA-SSR. The normal parameter set was as follows: -l 1 -L 700000 -m 1 -M 7 -n 16 -r 1 -i N. The overlap set was identical to normal with the following addition: -o. The exhaustive set was identical to overlap with the following addition: -e. Any SSRs with period size greater than 7, with total length less than 16nt, or that were incorrect were excluded from this comparison.

Why did SA-SSR not find the 900 SSRs that TRF found uniquely? By default, SA-SSR reports only one SSR when multiple may be found in an overlapping location. 851 of the 900 were also found by SA-SSR when this default behavior is changed to report every SSR, even though they overlap. Naturally, the number of unique SSRs found by SA-SSR as reported using the overlap parameter set is inflated as a result. The remaining 49 SSRs were also found by SA-SSR and they fall into three different categories. The categories are overstated period size, finding different numbers of repeats, and special cases requiring the exhaustive approach by SA-SSR. 10 of the 49 are cases where TRF overstated the period size (e.g., calling ATATATAT a 4-mer instead of a 2-mer). Obviously, reporting a longer period length than is strictly necessary to describe the SSR is misleading and certainly incorrect. AAAAAAAAAA has a period size of one repeated nine times, not three repeated three times. Likewise, ATATATAT has a period size of two repeated four times, not four repeated two times. Of the remaining 38, the 26 that were not found even under the exhaustive approach were actually found by SA-SSR. For 25 of the 26, SA-SSR correctly reported a larger number of repeats. So, while it appeared that SA-SSR didn't find them, it actually did. For these 25, both are correct, but SA-SSR is more complete. The last of the 26 was also found by SA-SSR, but SA-SSR correctly stated a shorter period size (another example where ATATATAT should be a 2-mer, not a 4-mer). This leaves us with 13 unaccounted for. 7 were more cases where TRF and SA-SSR either reported different SSRs (e.g., GT vs TG) or reported different number of repeats. Finally, the last 6 were found during the exhaustive approach and is a special, rare case involving the specific sequence and suffix sort. Of course, the number of unique SSRs found by SA-SSR as reported using the exhaustive parameter set is also inflated.



**Supplementary Table 18.** SA-SSR compared with GMATo for *Drosophila melanogaster*

|         |        | <b>1</b> | <b>2</b> | <b>3</b> | <b>4</b> | <b>5</b> | <b>6</b> | <b>7</b> | <b>Total</b>  |
|---------|--------|----------|----------|----------|----------|----------|----------|----------|---------------|
| Normal  | GMATo  | 0        | 0        | 0        | 15       | 20       | 151      | 281      | <b>467</b>    |
|         | SA-SSR | 4734     | 8094     | 3286     | 3328     | 1088     | 5557     | 1207     | <b>27294</b>  |
|         | Shared | 0        | 0        | 0        | 15       | 25       | 228      | 318      | <b>586</b>    |
| Overlap | GMATo  | 0        | 0        | 0        | 1        | 1        | 6        | 9        | <b>17</b>     |
|         | SA-SSR | 31700    | 47110    | 16452    | 14537    | 4328     | 25154    | 6006     | <b>145287</b> |
|         | Shared | 0        | 0        | 0        | 29       | 44       | 373      | 590      | <b>1036</b>   |

The number of SSRs in the *Drosophila melanogaster* genome found unique to GMATo, unique to SA-SSR, and shared between the two using two different sets of parameters for SA-SSR. The normal parameter set was as follows: -L 1000000 -m 1 -M 7 -n 16 -r 1 -i N. The overlap set was identical to normal with the following addition: -o. Any SSRs with period size greater than 7, with total length less than 16nt, or that were incorrect were excluded from this comparison.

Why did SA-SSR not find the 467 SSRs that GMATo found uniquely? By default, SA-SSR reports only one SSR when multiple may be found in an overlapping location. 450 of the 467 were also found by SA-SSR when this default behavior is changed to report every SSR, even though they overlap. Naturally, the number of unique SSRs found by SA-SSR as reported using the overlap parameter set is inflated as a result. The remaining 17 SSRs were also found by SA-SSR, but SA-SSR correctly reported longer SSRs than GMATo did (e.g., in sequence JXOZ01000280.1, SA-SSR reported CAGGGAC repeated 7 times beginning at position 73168 while GMATo reported the same repeating only 4 times).

**Supplementary Table 19.** SA-SSR compared with MREPS for *Drosophila melanogaster*

|            |        | <b>1</b> | <b>2</b> | <b>3</b> | <b>4</b> | <b>5</b> | <b>6</b> | <b>7</b> | <b>Total</b>  |
|------------|--------|----------|----------|----------|----------|----------|----------|----------|---------------|
| Normal     | MREPS  | 6        | 21       | 33       | 56       | 17       | 90       | 9        | <b>232</b>    |
|            | SA-SSR | 1        | 11       | 19       | 16       | 10       | 42       | 5        | <b>104</b>    |
|            | Shared | 4733     | 8083     | 3267     | 3327     | 1103     | 5743     | 1520     | <b>27776</b>  |
| Overlap    | MREPS  | 2        | 2        | 0        | 36       | 3        | 1        | 0        | <b>44</b>     |
|            | SA-SSR | 26963    | 39008    | 13152    | 11219    | 3255     | 19695    | 5067     | <b>118359</b> |
|            | Shared | 4737     | 8102     | 3300     | 3347     | 1117     | 5832     | 1529     | <b>27964</b>  |
| Exhaustive | MREPS  | 0        | 0        | 0        | 0        | 0        | 0        | 0        | <b>0</b>      |
|            | SA-SSR | 26963    | 70718    | 36560    | 90090    | 21713    | 91821    | 21709    | <b>359574</b> |
|            | Shared | 4739     | 8104     | 3300     | 3383     | 1120     | 5833     | 1529     | <b>28008</b>  |

The number of SSRs in the *Drosophila melanogaster* genome found unique to MREPS, unique to SA-SSR, and shared between the two using three different sets of parameters for SA-SSR. The normal parameter set was as follows: -L 1000000 -m 1 -M 7 -n 16 -r 1 -i N. The overlap set was identical to normal with the following addition: -o. The exhaustive set was identical to overlap with the following addition: -e. Any SSRs with period size greater than 7, with total length less than 16nt, or that were incorrect were excluded from this comparison.

Why did SA-SSR not find the 232 SSRs that MREPS found uniquely? By default, SA-SSR reports only one SSR when multiple may be found in an overlapping location. 188 of the 232 were also found by SA-SSR when this default behavior is changed to report every SSR, even though they overlap. Naturally, the number of unique SSRs found by SA-SSR as reported using the overlap parameter set is inflated as a result. 43 of the remaining 44 SSRs were also found by SA-SSR, but only when using the exhaustive approach because of a special, rare case involving the specific sequence and suffix sort order. The last SSR was a case where SA-SSR and MREPS simply reported a slightly different SSR (e.g., AT vs TA). The number of unique SSRs found by SA-SSR as reported using the exhaustive parameter set is also inflated.

**Supplementary Table 20.** SA-SSR compared with ProGeRF for *Drosophila melanogaster*

|         |         | <b>1</b> | <b>2</b> | <b>3</b> | <b>4</b> | <b>5</b> | <b>6</b> | <b>7</b> | <b>Total</b>  |
|---------|---------|----------|----------|----------|----------|----------|----------|----------|---------------|
| Normal  | ProGeRF | 1        | 1        | 4        | 0        | 1        | 3        | 0        | <b>10</b>     |
|         | SA-SSR  | 4651     | 7930     | 3233     | 3271     | 1095     | 5659     | 1485     | <b>27324</b>  |
|         | Shared  | 83       | 164      | 53       | 72       | 18       | 126      | 40       | <b>556</b>    |
| Overlap | ProGeRF | 0        | 1        | 2        | 0        | 0        | 1        | 0        | <b>4</b>      |
|         | SA-SSR  | 31616    | 46946    | 16397    | 14494    | 4353     | 25399    | 6556     | <b>145761</b> |
|         | Shared  | 84       | 164      | 55       | 72       | 19       | 128      | 40       | <b>562</b>    |

The number of SSRs in the *Drosophila melanogaster* genome found unique to ProGeRF, unique to SA-SSR, and shared between the two using two different sets of parameters for SA-SSR. The normal parameter set was as follows: -L 1000000 -m 1 -M 7 -n 16 -r 1 -i N. The overlap set was identical to normal with the following addition: -o. Any SSRs with period size greater than 7, with total length less than 16nt, or that were incorrect were excluded from this comparison.

Why did SA-SSR not find the 10 SSRs that ProGeRF found uniquely? By default, SA-SSR reports only one SSR when multiple may be found in an overlapping location. 6 of the 10 were also found by SA-SSR when this default behavior is changed to report every SSR, even though they overlap. Naturally, the number of unique SSRs found by SA-SSR as reported using the overlap parameter set is inflated as a result. The remaining 4 SSRs were also found by SA-SSR, but SA-SSR correctly reported shorter period lengths than ProGeRF did (e.g., in sequence JXOZ01000073.1, SA-SSR reported A repeated 19 times beginning at position 136707 while ProGeRF reported AAA repeating 6 times at the same position). Obviously, reporting a longer period length than is strictly necessary to describe the SSR is misleading and certainly incorrect. AAAAAAAAAA has a period size of one repeated nine times, not three repeated three times. Likewise, ATATATAT has a period size of two repeated four times, not four repeated two times.

**Supplementary Table 21.** SA-SSR compared with QDD for *Drosophila melanogaster*

|                   |        | <b>1</b> | <b>2</b> | <b>3</b> | <b>4</b> | <b>5</b> | <b>6</b> | <b>7</b> | <b>Total</b>  |
|-------------------|--------|----------|----------|----------|----------|----------|----------|----------|---------------|
| <b>Normal</b>     | QDD    | 0        | 25       | 22       | 8        | 6        | 2        | 0        | <b>63</b>     |
|                   | SA-SSR | 4734     | 18       | 15       | 2246     | 880      | 5594     | 1525     | <b>15012</b>  |
|                   | Shared | 0        | 8076     | 3271     | 1097     | 233      | 191      | 0        | <b>12868</b>  |
| <b>Overlap</b>    | QDD    | 0        | 2        | 0        | 2        | 0        | 0        | 0        | <b>4</b>      |
|                   | SA-SSR | 31700    | 39011    | 13159    | 13463    | 4133     | 25334    | 6596     | <b>133396</b> |
|                   | Shared | 0        | 8099     | 3293     | 1103     | 239      | 193      | 0        | <b>12927</b>  |
| <b>Exhaustive</b> | QDD    | 0        | 0        | 0        | 0        | 0        | 0        | 0        | <b>0</b>      |
|                   | SA-SSR | 31702    | 70721    | 36567    | 92368    | 22594    | 97461    | 23238    | <b>374651</b> |
|                   | Shared | 0        | 8101     | 3293     | 1105     | 239      | 193      | 0        | <b>12931</b>  |

The number of SSRs in the *Drosophila melanogaster* genome found unique to QDD, unique to SA-SSR, and shared between the two using three different sets of parameters for SA-SSR. The normal parameter set was as follows: -L 1000000 -m 1 -M 7 -n 16 -r 1 -i N. The overlap set was identical to normal with the following addition: -o. The exhaustive set was identical to overlap with the following addition: -e. Any SSRs with period size greater than 7, with total length less than 16nt, or that were incorrect were excluded from this comparison.

Why did SA-SSR not find the 63 SSRs that QDD found uniquely? By default, SA-SSR reports only one SSR when multiple may be found in an overlapping location. 59 of the 63 were also found by SA-SSR when this default behavior is changed to report every SSR, even though they overlap. Naturally, the number of unique SSRs found by SA-SSR as reported using the overlap parameter set is inflated as a result. The remaining 4 SSRs were also found by SA-SSR, but only when using the exhaustive approach because of a special, rare case involving the specific sequence and suffix sort order. The number of unique SSRs found by SA-SSR as reported using the exhaustive parameter set is also inflated.

**Supplementary Table 22.** SA-SSR compared with SSR-Pipeline for *Drosophila melanogaster*

|                   |              | <b>1</b> | <b>2</b> | <b>3</b> | <b>4</b> | <b>5</b> | <b>6</b> | <b>7</b> | <b>Total</b>  |
|-------------------|--------------|----------|----------|----------|----------|----------|----------|----------|---------------|
| <b>Normal</b>     | SSR-Pipeline | 6        | 386      | 207      | 152      | 45       | 166      | 25       | <b>987</b>    |
|                   | SA-SSR       | 1        | 473      | 271      | 190      | 70       | 298      | 51       | <b>1354</b>   |
|                   | Shared       | 4733     | 7621     | 3015     | 3153     | 1043     | 5487     | 1474     | <b>26526</b>  |
| <b>Overlap</b>    | SSR-Pipeline | 2        | 2        | 0        | 36       | 2        | 1        | 0        | <b>43</b>     |
|                   | SA-SSR       | 26963    | 39105    | 13230    | 11297    | 3286     | 19875    | 5097     | <b>118853</b> |
|                   | Shared       | 4737     | 8005     | 3222     | 3269     | 1086     | 5652     | 1499     | <b>27470</b>  |
| <b>Exhaustive</b> | SSR-Pipeline | 0        | 0        | 0        | 0        | 0        | 0        | 0        | <b>0</b>      |
|                   | SA-SSR       | 26963    | 70815    | 36638    | 90168    | 21745    | 92001    | 21739    | <b>360069</b> |
|                   | Shared       | 4739     | 8007     | 3222     | 3305     | 1088     | 5653     | 1499     | <b>27513</b>  |

The number of SSRs in the *Drosophila melanogaster* genome found unique to SSR-Pipeline, unique to SA-SSR, and shared between the two using three different sets of parameters for SA-SSR. The normal parameter set was as follows: -L 1000000 -m 1 -M 7 -n 16 -r 1 -i N. The overlap set was identical to normal with the following addition: -o. The exhaustive set was identical to overlap with the following addition: -e. Any SSRs with period size greater than 7, with total length less than 16nt, or that were incorrect were excluded from this comparison.

Why did SA-SSR not find the 987 SSRs that SSR-Pipeline found uniquely? By default, SA-SSR reports only one SSR when multiple may be found in an overlapping location. 944 of the 987 were also found by SA-SSR when this default behavior is changed to report every SSR, even though they overlap. Naturally, the number of unique SSRs found by SA-SSR as reported using the overlap parameter set is inflated as a result. 42 of the remaining 43 SSRs were also found by SA-SSR, but only when using the exhaustive approach because of a special, rare case involving the specific sequence and suffix sort order. The last SSR was a case where SA-SSR and SSR-Pipeline simply reported a slightly different SSR (e.g., AT vs TA). The number of unique SSRs found by SA-SSR as reported using the exhaustive parameter set is also inflated.

**Supplementary Table 23.** SA-SSR compared with SSRIT for *Drosophila melanogaster*

|                   |        | <b>1</b> | <b>2</b> | <b>3</b> | <b>4</b> | <b>5</b> | <b>6</b> | <b>7</b> | <b>Total</b>  |
|-------------------|--------|----------|----------|----------|----------|----------|----------|----------|---------------|
| <b>Normal</b>     | SSRIT  | 0        | 12       | 32       | 12       | 0        | 0        | 0        | <b>56</b>     |
|                   | SA-SSR | 4734     | 2570     | 18       | 2248     | 1113     | 5785     | 1525     | <b>17993</b>  |
|                   | Shared | 0        | 5524     | 3268     | 1095     | 0        | 0        | 0        | <b>9887</b>   |
| <b>Overlap</b>    | SSRIT  | 0        | 0        | 0        | 2        | 0        | 0        | 0        | <b>2</b>      |
|                   | SA-SSR | 31700    | 41574    | 13152    | 13461    | 4372     | 25527    | 6596     | <b>136382</b> |
|                   | Shared | 0        | 5536     | 3300     | 1105     | 0        | 0        | 0        | <b>9941</b>   |
| <b>Exhaustive</b> | SSRIT  | 0        | 0        | 0        | 0        | 0        | 0        | 0        | <b>0</b>      |
|                   | SA-SSR | 31702    | 73286    | 36560    | 92366    | 22833    | 97654    | 23238    | <b>377639</b> |
|                   | Shared | 0        | 5536     | 3300     | 1107     | 0        | 0        | 0        | <b>9943</b>   |

The number of SSRs in the *Drosophila melanogaster* genome found unique to SSRIT, unique to SA-SSR, and shared between the two using three different sets of parameters for SA-SSR. The normal parameter set was as follows: -L 1000000 -m 1 -M 7 -n 16 -r 1 -i N. The overlap set was identical to normal with the following addition: -o. The exhaustive set was identical to overlap with the following addition: -e. Any SSRs with period size greater than 7, with total length less than 16nt, or that were incorrect were excluded from this comparison.

Why did SA-SSR not find the 56 SSRs that SSRIT found uniquely? By default, SA-SSR reports only one SSR when multiple may be found in an overlapping location. 54 of the 56 were also found by SA-SSR when this default behavior is changed to report every SSR, even though they overlap. Naturally, the number of unique SSRs found by SA-SSR as reported using the overlap parameter set is inflated as a result. The remaining 2 SSRs were also found by SA-SSR, but only when using the exhaustive approach because of a special, rare case involving the specific sequence and suffix sort order. The number of unique SSRs found by SA-SSR as reported using the exhaustive parameter set is also inflated.

**Supplementary Table 24.** SA-SSR compared with TRF for *Drosophila melanogaster*

|            |        | 1     | 2     | 3     | 4     | 5     | 6     | 7     | Total         |
|------------|--------|-------|-------|-------|-------|-------|-------|-------|---------------|
| Normal     | TRF    | 5     | 769   | 373   | 323   | 61    | 528   | 128   | <b>2187</b>   |
|            | SA-SSR | 22    | 1042  | 551   | 544   | 210   | 1224  | 318   | <b>3911</b>   |
|            | Shared | 4712  | 7052  | 2735  | 2799  | 903   | 4561  | 1207  | <b>23969</b>  |
| Overlap    | TRF    | 1     | 53    | 14    | 54    | 9     | 36    | 2     | <b>169</b>    |
|            | SA-SSR | 26984 | 39342 | 13358 | 11498 | 3417  | 20474 | 5263  | <b>120336</b> |
|            | Shared | 4716  | 7768  | 3094  | 3068  | 955   | 5053  | 1333  | <b>25987</b>  |
| Exhaustive | TRF    | 0     | 52    | 13    | 15    | 8     | 13    | 2     | <b>103</b>    |
|            | SA-SSR | 26985 | 71053 | 36765 | 90366 | 21877 | 92578 | 21905 | <b>361529</b> |
|            | Shared | 4717  | 7769  | 3095  | 3107  | 956   | 5076  | 1333  | <b>26053</b>  |

The number of SSRs in the *Drosophila melanogaster* genome found unique to TRF, unique to SA-SSR, and shared between the two using three different sets of parameters for SA-SSR. The normal parameter set was as follows: -L 1000000 -m 1 -M 7 -n 16 -r 1 -i N. The overlap set was identical to normal with the following addition: -o. The exhaustive set was identical to overlap with the following addition: -e. Any SSRs with period size greater than 7, with total length less than 16nt, or that were incorrect were excluded from this comparison.

Why did SA-SSR not find the 2187 SSRs that TRF found uniquely? By default, SA-SSR reports only one SSR when multiple may be found in an overlapping location. 2018 of the 2187 were also found by SA-SSR when this default behavior is changed to report every SSR, even though they overlap. Naturally, the number of unique SSRs found by SA-SSR as reported using the overlap parameter set is inflated as a result. The remaining 169 SSRs were also found by SA-SSR and they fall into three different categories. The categories are overstated period size, finding different numbers of repeats, and special cases requiring the exhaustive approach by SA-SSR. 60 of the 169 are cases where TRF overstated the period size (e.g., in sequence JXOZ01000843.1, TRF reports an AGAG repeating 4 times at position 109312 while SA-SSR correctly reports an AG repeated 8 times at the same position). 2 of these appear again in the 103 that SA-SSR didn't appear to find using the exhaustive parameter set, but SA-SSR did find them, it just reported the correct period size. Obviously, reporting a longer period length than is strictly necessary to describe the SSR is misleading and certainly incorrect. AAAAAAAAAA has a period size of one repeated nine times, not three repeated three times. Likewise, ATATATAT has a period size of two repeated four times, not four repeated two times. The remaining 111 cases fall into the other two categories. 104 of the 169 are cases where TRF and SA-SSR reported different SSRs (e.g., AT vs TA) or TRF reported less repeats of the same SSR (e.g., in sequence JXOZ01001169.1, TRF reports a TTTCGA repeated 3 times at position 83483 while SA-SSR reports the same repeated 4 times). 101 of these also appear not to be found using the exhaustive parameter set because SA-SSR correctly reported SSRs with more repeats. The remaining 5 were also found by SA-SSR, but only when using the exhaustive approach because of a special, rare case involving the specific sequence and suffix sort order. The number of unique SSRs found by SA-SSR as reported using the exhaustive parameter set is also inflated.

**Supplementary Table 25.** SA-SSR compared with GMATo for *Escherichia coli*

|         |        | <b>1</b> | <b>2</b> | <b>3</b> | <b>4</b> | <b>5</b> | <b>6</b> | <b>7</b> | <b>Total</b> |
|---------|--------|----------|----------|----------|----------|----------|----------|----------|--------------|
| Normal  | GMATo  | 0        | 0        | 0        | 0        | 0        | 7        | 1        | <b>8</b>     |
|         | SA-SSR | 1        | 0        | 0        | 0        | 0        | 13       | 1        | <b>15</b>    |
|         | Shared | 0        | 0        | 0        | 1        | 0        | 4        | 0        | <b>5</b>     |
| Overlap | GMATo  | 0        | 0        | 0        | 0        | 0        | 0        | 0        | <b>0</b>     |
|         | SA-SSR | 5        | 0        | 0        | 2        | 0        | 287      | 36       | <b>330</b>   |
|         | Shared | 0        | 0        | 0        | 1        | 0        | 11       | 1        | <b>13</b>    |

The number of SSRs in the *Escherichia coli* genome found unique to GMATo, unique to SA-SSR, and shared between the two using two different sets of parameters for SA-SSR. The normal parameter set was as follows: -l 1 -L 600000 -m 1 -M 7 -n 16 -r 1. The overlap set was identical to normal with the following addition: -o. Any SSRs with period size greater than 7, with total length less than 16nt, or that were incorrect were excluded from this comparison.

Why did SA-SSR not find the 8 SSRs that GMATo found uniquely? By default, SA-SSR reports only one SSR when multiple may be found in an overlapping location. All 8 were also found by SA-SSR when this default behavior is changed to report every SSR, even though they overlap. Naturally, the number of unique SSRs found by SA-SSR as reported using the overlap parameter set is inflated as a result.



**Supplementary Table 26.** SA-SSR compared with MREPS for *Escherichia coli*

|        | <b>1</b> | <b>2</b> | <b>3</b> | <b>4</b> | <b>5</b> | <b>6</b> | <b>7</b> | <b>Total</b> |
|--------|----------|----------|----------|----------|----------|----------|----------|--------------|
| MREPS  | 0        | 0        | 0        | 0        | 0        | 0        | 0        | <b>0</b>     |
| SA-SSR | 1        | 0        | 0        | 0        | 0        | 0        | 0        | <b>1</b>     |
| Shared | 0        | 0        | 0        | 1        | 0        | 17       | 1        | <b>19</b>    |

The number of SSRs in the *Escherichia coli* genome found unique to MREPS, unique to SA-SSR, and shared between the two using the following parameter set: -l 1 -L 600000 -m 1 -M 7 -n 16 -r 1. Any SSRs with period size greater than 7, with total length less than 16nt, or that were incorrect were excluded from this comparison.

**Supplementary Table 27.** SA-SSR compared with ProGeRF for *Escherichia coli*

|         | <b>1</b> | <b>2</b> | <b>3</b> | <b>4</b> | <b>5</b> | <b>6</b> | <b>7</b> | <b>Total</b> |
|---------|----------|----------|----------|----------|----------|----------|----------|--------------|
| ProGeRF | 0        | 0        | 0        | 0        | 0        | 0        | 0        | <b>0</b>     |
| SA-SSR  | 1        | 0        | 0        | 1        | 0        | 13       | 1        | <b>16</b>    |
| Shared  | 0        | 0        | 0        | 0        | 0        | 4        | 0        | <b>4</b>     |

The number of SSRs in the *Escherichia coli* genome found unique to ProGeRF, unique to SA-SSR, and shared between the two using the following parameter set: -l 1 -L 600000 -m 1 -M 7 -n 16 -r 1. Any SSRs with period size greater than 7, with total length less than 16nt, or that were incorrect were excluded from this comparison.

**Supplementary Table 28.** SA-SSR compared with QDD for *Escherichia coli*

|         |        | <b>1</b> | <b>2</b> | <b>3</b> | <b>4</b> | <b>5</b> | <b>6</b> | <b>7</b> | <b>Total</b> |
|---------|--------|----------|----------|----------|----------|----------|----------|----------|--------------|
| Normal  | QDD    | 0        | 0        | 0        | 0        | 0        | 8        | 0        | <b>8</b>     |
|         | SA-SSR | 1        | 0        | 0        | 1        | 0        | 17       | 1        | <b>20</b>    |
|         | Shared | 0        | 0        | 0        | 0        | 0        | 0        | 0        | <b>0</b>     |
| <hr/>   |        |          |          |          |          |          |          |          |              |
| Overlap | QDD    | 0        | 0        | 0        | 0        | 0        | 0        | 0        | <b>0</b>     |
|         | SA-SSR | 5        | 0        | 0        | 3        | 0        | 290      | 37       | <b>335</b>   |
|         | Shared | 0        | 0        | 0        | 0        | 0        | 8        | 0        | <b>8</b>     |

The number of SSRs in the *Escherichia coli* genome found unique to QDD, unique to SA-SSR, and shared between the two using two different sets of parameters for SA-SSR. The normal parameter set was as follows: -l 1 -L 600000 -m 1 -M 7 -n 16 -r 1. The overlap set was identical to normal with the following addition: -o. Any SSRs with period size greater than 7, with total length less than 16nt, or that were incorrect were excluded from this comparison.

Why did SA-SSR not find the 8 SSRs that QDD found uniquely? By default, SA-SSR reports only one SSR when multiple may be found in an overlapping location. All 8 were also found by SA-SSR when this default behavior is changed to report every SSR, even though they overlap. Naturally, the number of unique SSRs found by SA-SSR as reported using the overlap parameter set is inflated as a result.

**Supplementary Table 29.** SA-SSR compared with SSR-Pipeline for *Escherichia coli*

|              | <b>1</b> | <b>2</b> | <b>3</b> | <b>4</b> | <b>5</b> | <b>6</b> | <b>7</b> | <b>Total</b> |
|--------------|----------|----------|----------|----------|----------|----------|----------|--------------|
| SSR-Pipeline | 0        | 0        | 0        | 0        | 0        | 0        | 0        | <b>0</b>     |
| SA-SSR       | 1        | 0        | 0        | 1        | 0        | 17       | 1        | <b>20</b>    |
| Shared       | 0        | 0        | 0        | 0        | 0        | 0        | 0        | <b>0</b>     |

The number of SSRs in the *Escherichia coli* genome found unique to SSR-Pipeline, unique to SA-SSR, and shared between the two using the following parameter set: -l 1 -L 600000 -m 1 -M 7 -n 16 -r 1. Any SSRs with period size greater than 7, with total length less than 16nt, or that were incorrect were excluded from this comparison.

**Supplementary Table 30.** SA-SSR compared with SSRIT for *Escherichia coli*

|        | <b>1</b> | <b>2</b> | <b>3</b> | <b>4</b> | <b>5</b> | <b>6</b> | <b>7</b> | <b>Total</b> |
|--------|----------|----------|----------|----------|----------|----------|----------|--------------|
| SSRIT  | 0        | 0        | 0        | 0        | 0        | 0        | 0        | <b>0</b>     |
| SA-SSR | 1        | 0        | 0        | 1        | 0        | 17       | 1        | <b>20</b>    |
| Shared | 0        | 0        | 0        | 0        | 0        | 0        | 0        | <b>0</b>     |

The number of SSRs in the *Escherichia coli* genome found unique to SSRIT, unique to SA-SSR, and shared between the two using the following parameter set: -l 1 -L 600000 -m 1 -M 7 -n 16 -r 1. Any SSRs with period size greater than 7, with total length less than 16nt, or that were incorrect were excluded from this comparison.

**Supplementary Table 31.** SA-SSR compared with TRF for *Escherichia coli*

|        | <b>1</b> | <b>2</b> | <b>3</b> | <b>4</b> | <b>5</b> | <b>6</b> | <b>7</b> | <b>Total</b> |
|--------|----------|----------|----------|----------|----------|----------|----------|--------------|
| TRF    | 0        | 0        | 0        | 0        | 0        | 0        | 0        | <b>0</b>     |
| SA-SSR | 1        | 0        | 0        | 0        | 0        | 0        | 0        | <b>1</b>     |
| Shared | 0        | 0        | 0        | 1        | 0        | 17       | 1        | <b>19</b>    |

The number of SSRs in the *Escherichia coli* genome found unique to TRF, unique to SA-SSR, and shared between the two using the following parameter set: -l 1 -L 600000 -m 1 -M 7 -n 16 -r 1. Any SSRs with period size greater than 7, with total length less than 16nt, or that were incorrect were excluded from this comparison.

## Supplementary References

Benson, G. (1999) Tandem repeats finder: a program to analyze DNA sequences, *Nucleic acids research*, **27**, 573.

Kolpakov, R., Bana, G. and Kucherov, G. (2003) mreps: efficient and flexible detection of tandem repeats in DNA, *Nucleic acids research*, **31**, 3672-3678.

Lopes, R.d.S., *et al.* (2015) ProGeRF: Proteome and Genome Repeat Finder Utilizing a Fast Parallel Hash Function, *BioMed research international*, **2015**.

Megléczy, E., *et al.* (2014) QDD version 3.1: a user-friendly computer program for microsatellite selection and primer design revisited: experimental validation of variables determining genotyping success rate, *Molecular ecology resources*, **14**, 1302-1313.

Miller, M.P., *et al.* (2013) SSR\_pipeline: A bioinformatic infrastructure for identifying microsatellites from paired-end Illumina high-throughput DNA sequencing data, *Journal of Heredity*, est056.

Temnykh, S., *et al.* (2001) Computational and experimental analysis of microsatellites in rice (*Oryza sativa* L.): frequency, length variation, transposon associations, and genetic marker potential, *Genome research*, **11**, 1441-1452.

Wang, X., Lu, P. and Luo, Z. (2013) GMATo: A novel tool for the identification and analysis of microsatellites in large genomes, *Bioinformatics*, **9**, 541-544.
